# Supplementary material for: COSA-1 mediated pro-crossover complex formation promotes meiotic crossing over in C. elegans
Source: PubMed Central journal article supplement (PMC11077092; doi:10.1093/nar/gkae130), 2024-02-27
Supplement: gkae130_supplemental_file.pdf [file gkae130_supplemental_file.pdf]

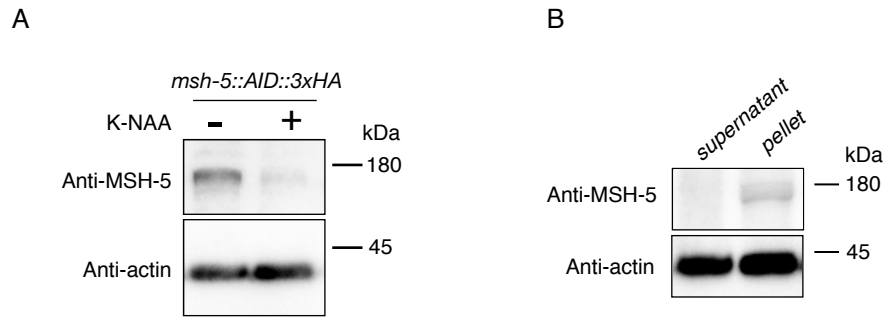

**Figure S1**

**MSH-5 protein was barely soluble in the lysis buffer normally used for co-IP**

(A) Test of MSH-5 antibodies by Western blot. (B) Analysis of solubility of endogenous MSH-5 protein.

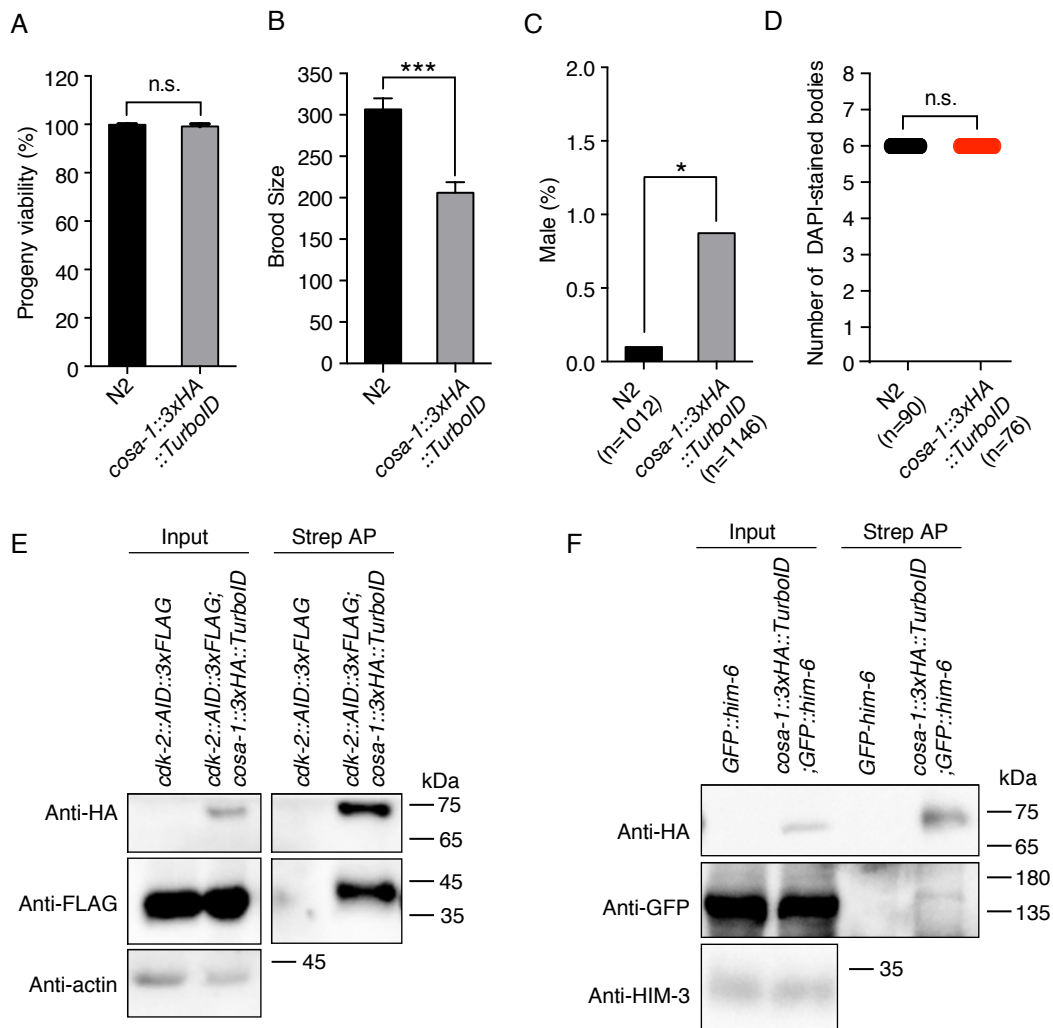

## Figure S2

(A-C) Quantification of the progeny viability, brood size, and the frequency of male offspring among the progeny of *cosa-1::3xHA::TurboID* knock-in worms. Statistical analyses were conducted using T-test (A and B) and Z-test for 2 population proportions (C), n.s., not significant  $p > 0.05$ ; \*  $p < 0.05$ . (D) Quantification of the number of DAPI-stained bodies in diakinesis oocytes of N2 and *cosa-1::3xHA::TurboID* strain. (E) Western blotting analysis revealed that CDK-2 proteins are biotinylated among proteins enriched with streptavidin beads. (F) Biotinylated GFP::HIM-6 proteins are detected by western blotting with antibodies against GFP. Proteins biotinylated by TurboID were enriched with streptavidin beads and examined by western blotting.

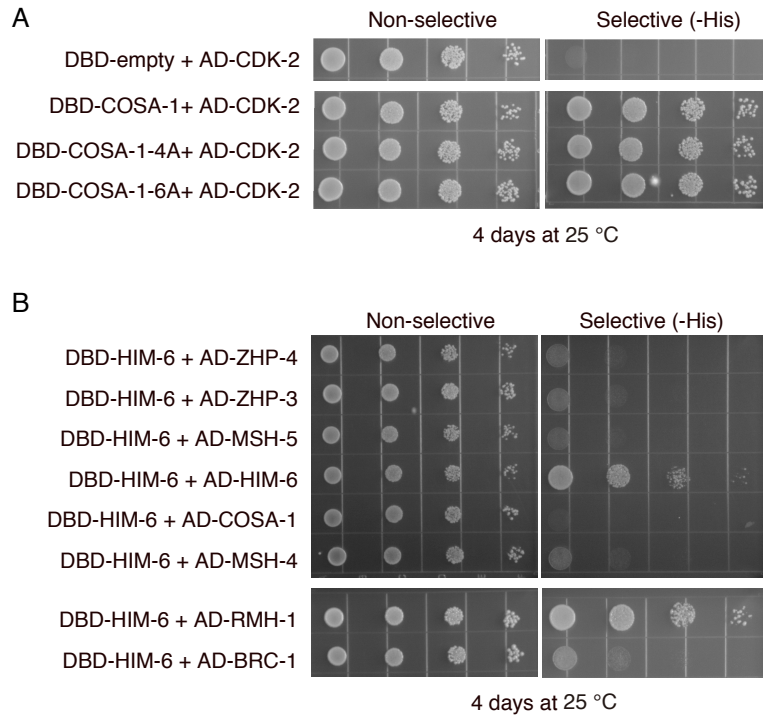

**Figure S3**

(A) Analysis of interactions between COSA-1 mutants and CDK-2 by yeast two-hybrid system. (B) Analysis of interactions between HIM-6 and other pro-CO proteins by yeast two-hybrid system.

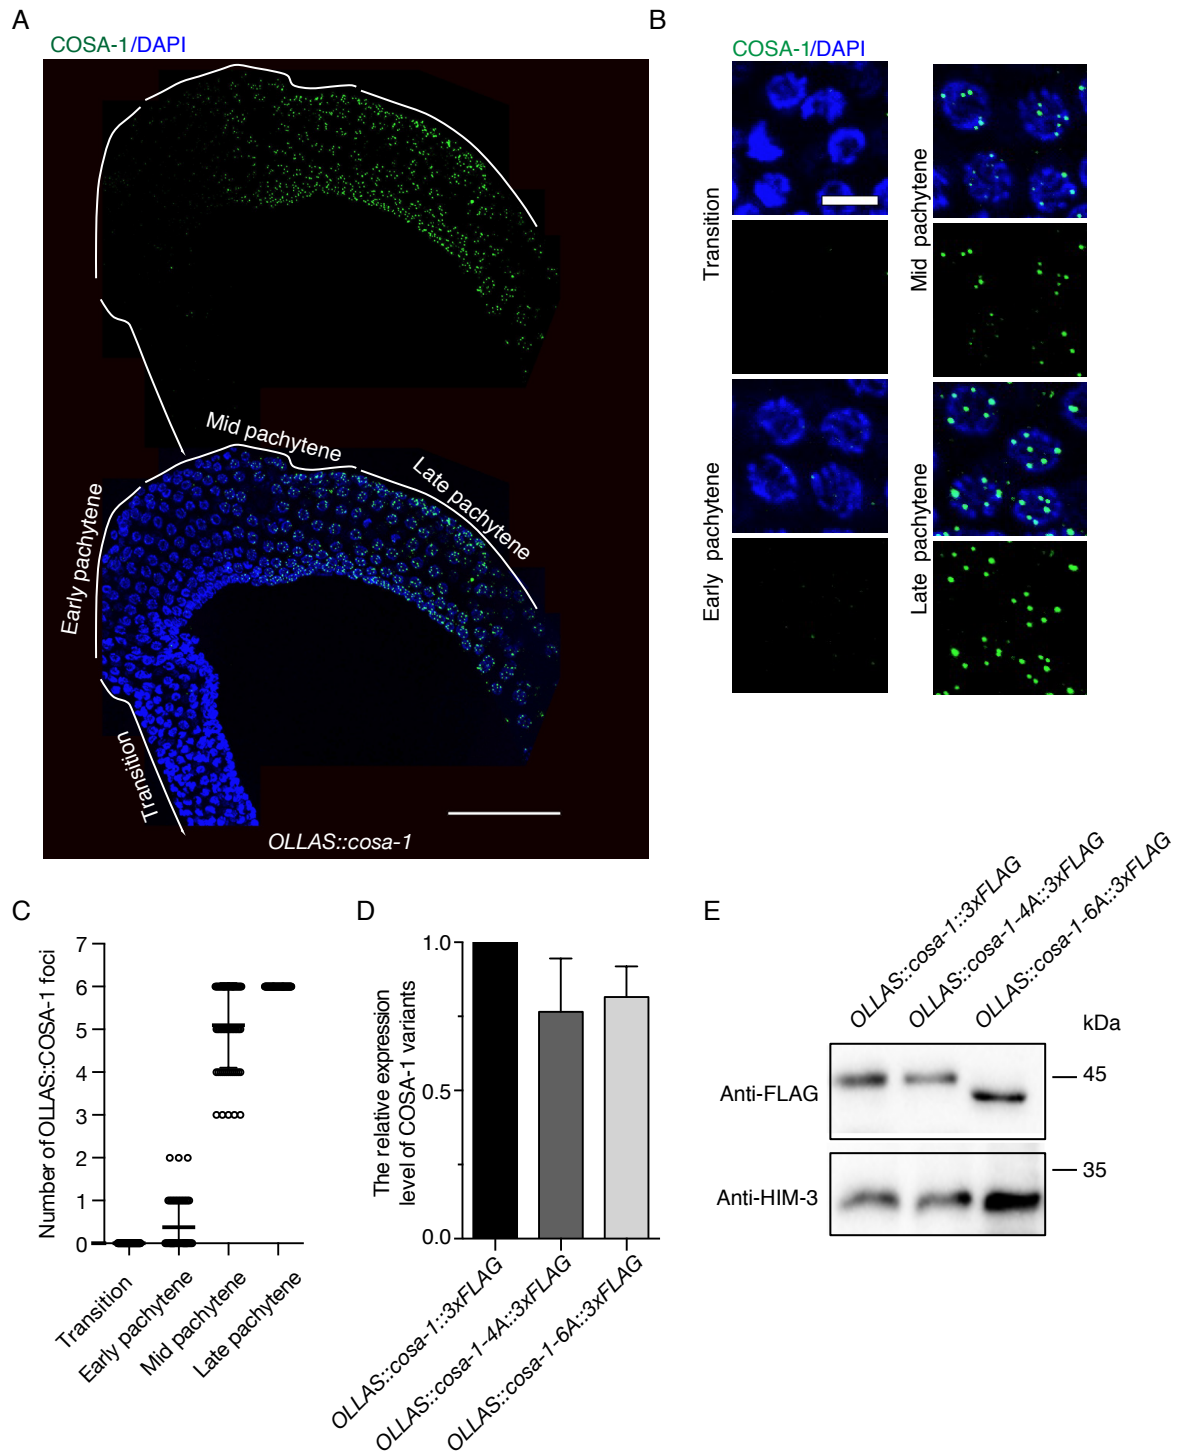

**Figure S4**

**Analysis of interaction-compromised *cosa-1* mutants**

(A) Whole gonad immunostaining with antibodies against OLLAS to detect COSA-1 (green), counterstained with DAPI (blue). Scalebar, 50  $\mu$ m. (B) Representative images of nuclei from indicated regions of germline stained with antibodies against OLLAS to detect COSA-1 (green), counterstained with DAPI (blue). Scalebar, 5  $\mu$ m. (C) Quantification of the OLLAS::COSA-1 foci in nuclei from indicated regions of germline. (D) Quantification of the relative expression levels of COSA-1-4A and COSA-1-6A mutant proteins compared with wild-type COSA-1. (E) Immunoblot showing the expression of the COSA-1-4A and COSA-1-6A proteins in whole worm lysates. HIM-3 was used as a loading control.

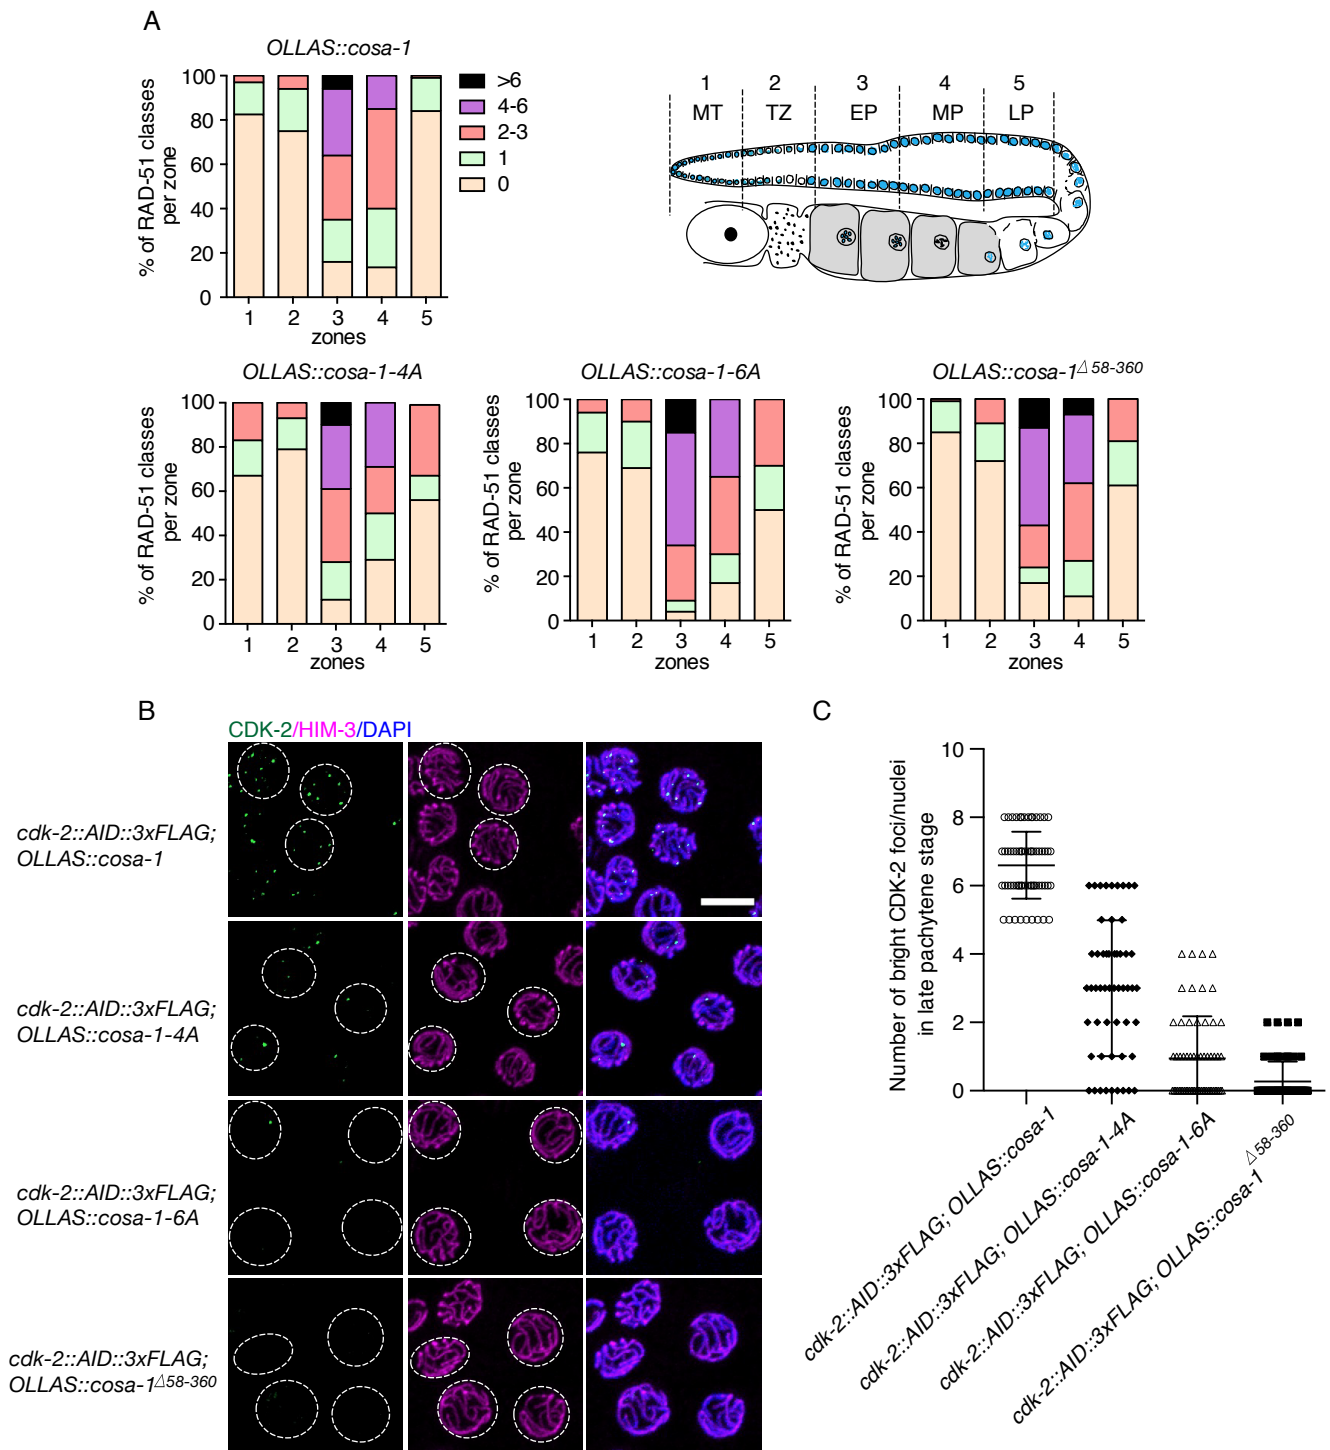

**Figure S5**

**Analysis of RAD-51 and CDK-2 foci in *cosa-1-4A* and *cosa-1-6A* mutants**

(A) Quantification of RAD-51 foci in indicated regions of the germline. Zone definitions: 1) MT, mitotic-, 2) TZ, transition-, 3) EP, early pachytene-, 4) MP, mid pachytene-, 5) LP, late pachytene zone. (B) Representative images of late pachytene nuclei of the indicated genotypes stained with antibodies against FLAG to detect CDK-2 (green) and HIM-3 (magenta), counterstained with DAPI (blue). Scalebar, 5  $\mu$ m. (C) Quantification of bright CDK-2 foci in the late pachytene nuclei of *cosa-1-4A* and *cosa-1-6A* mutants.

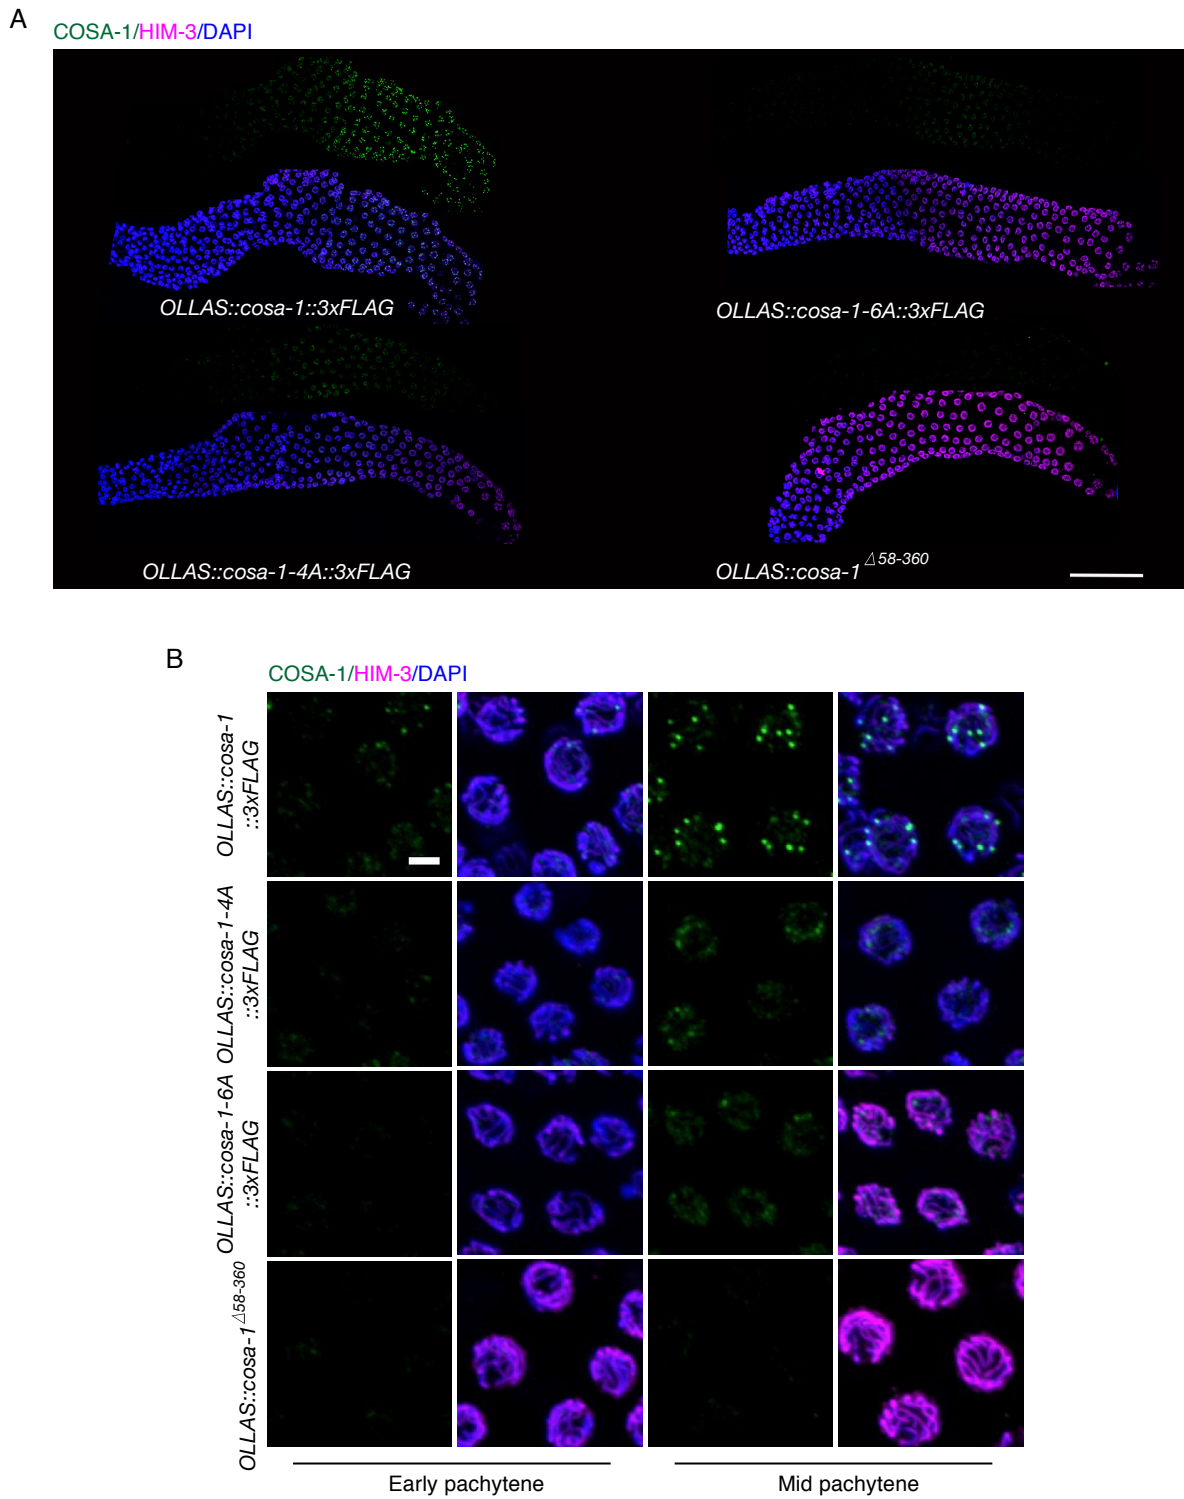

**Figure S6**

**Analysis of COSA-1 foci in *cosa-1-4A* and *cosa-1-6A* mutants**

(A) Whole gonad immunostaining with antibodies against FLAG to detect COSA-1 (green) and HIM-3 (magenta). Scalebar, 50  $\mu$ m. (B) Close-up images of fields of nuclei in early and mid pachytene of the indicated genotypes. Scalebar 2  $\mu$ m.

A

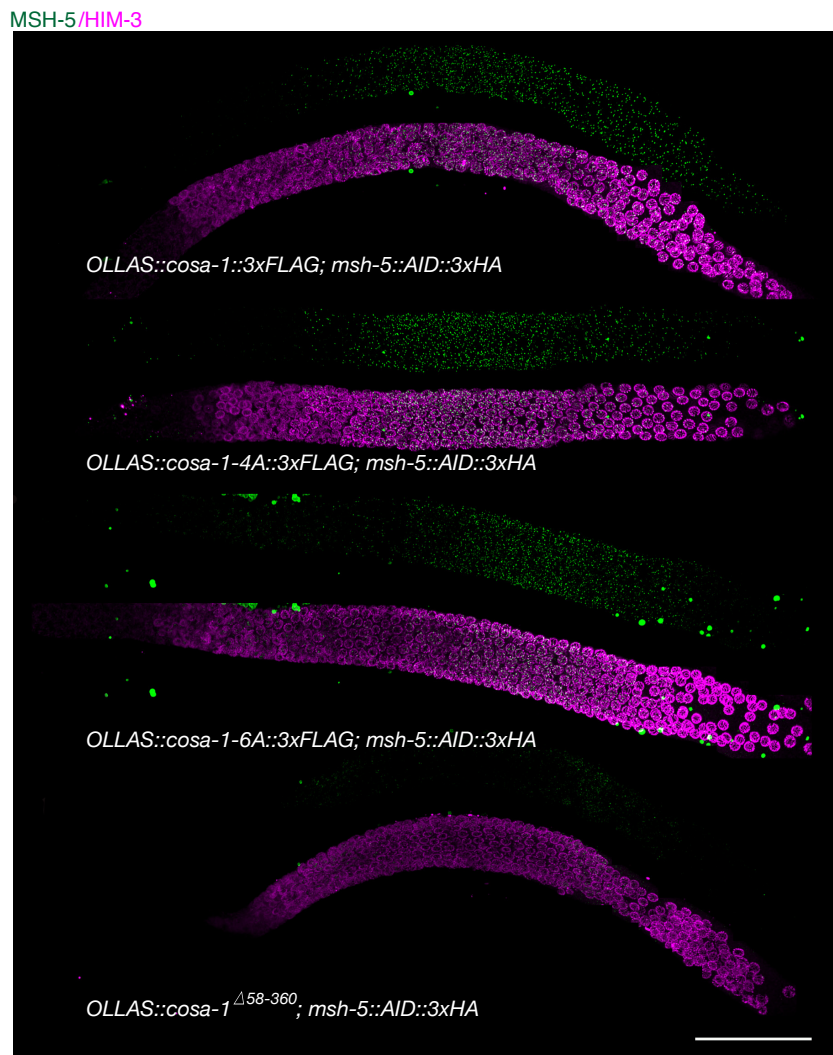

B

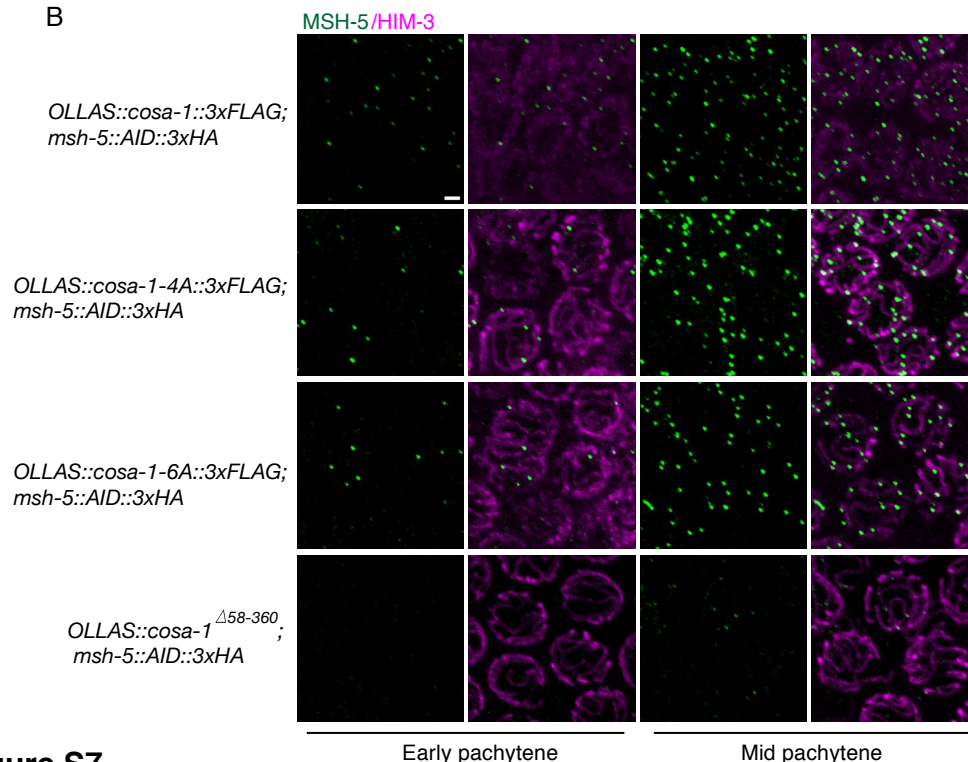

**Figure S7**

**Localization of MSH-5 is normal in *cosa-1-4A* and *cosa-1-6A* mutants**

(A) Immunostaining with antibodies against HA to detect MSH-5 (green) and HIM-3 (magenta) of spread germlines from the indicated genotypes. Scalebar, 50  $\mu$ m.

(B) Close-up images of fields of nuclei in early and mid pachytene of the indicated genotypes. Scalebar 2  $\mu$ m.

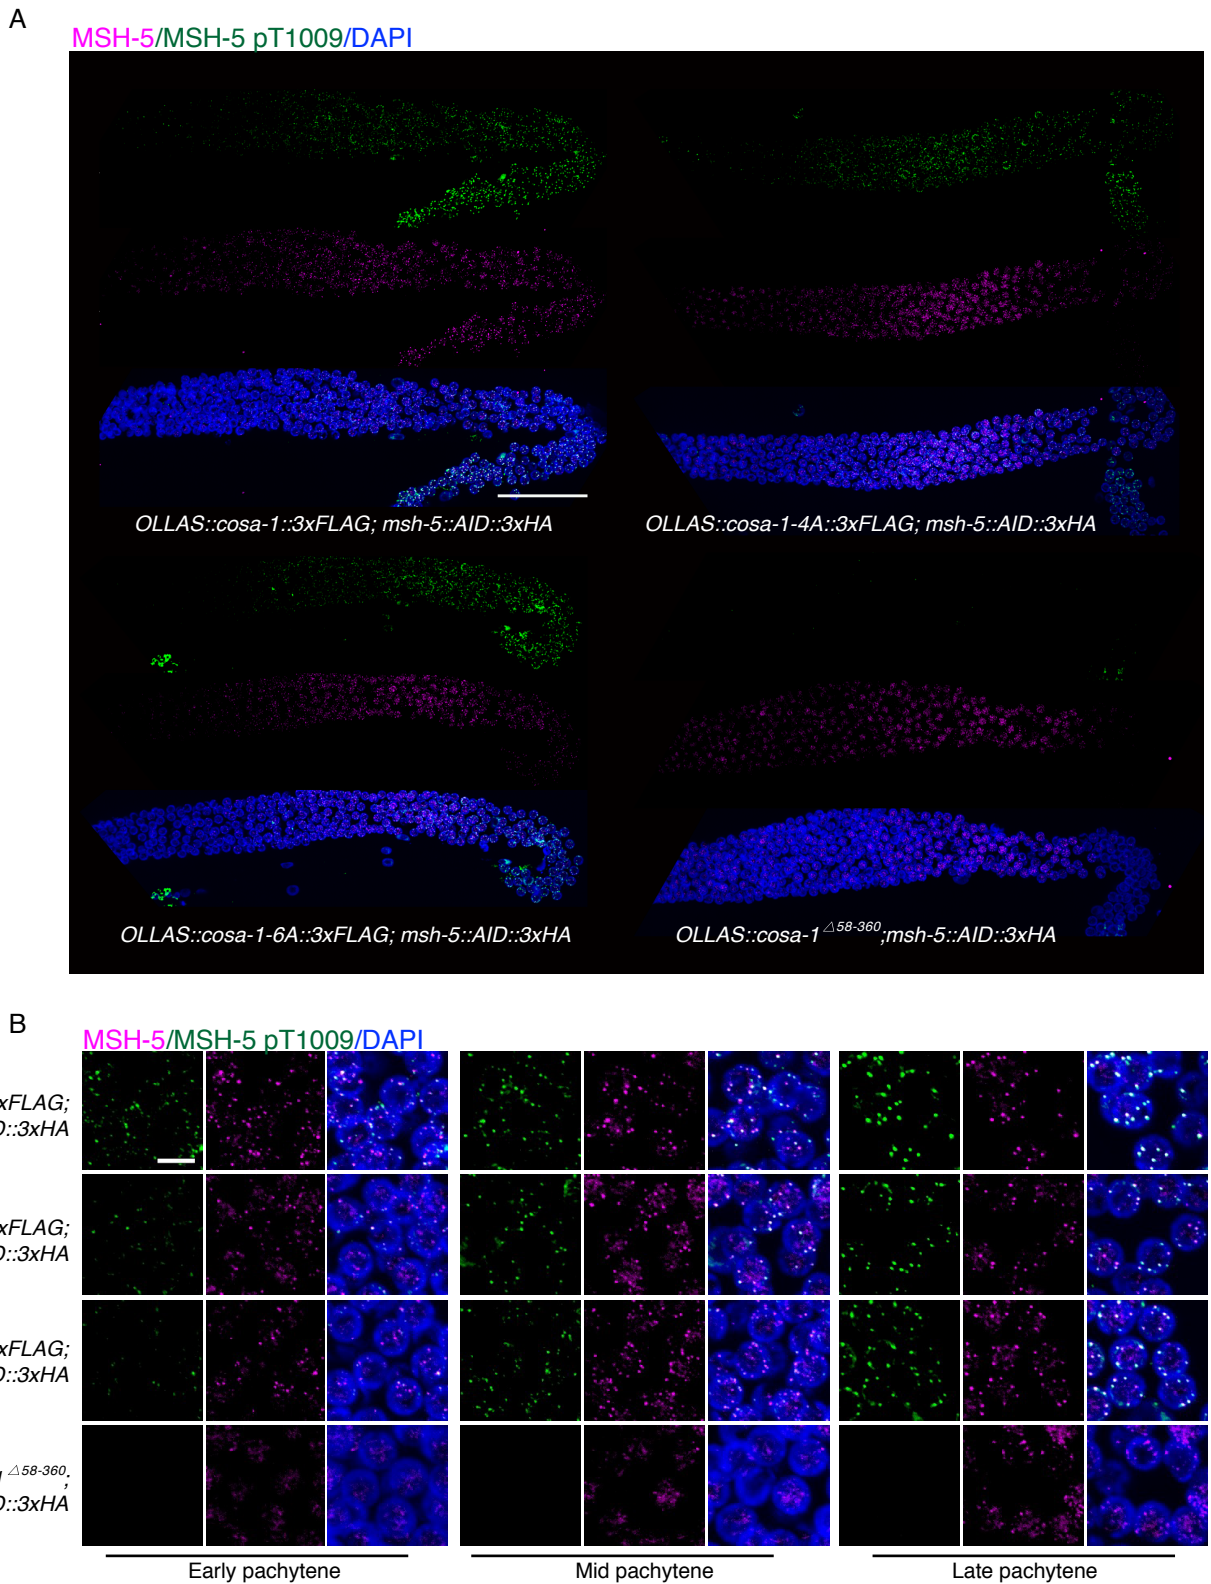

**Figure S8**

**Phosphorylation of MSH-5 is normal in *cosa-1-4A* and *cosa-1-6A* mutants**

(A) Immunostaining with antibodies against MSH-5 pT1009 (green) and MSH-5 (magenta) of spread germlines from the indicated genotypes. Scalebar, 50  $\mu$ m.

(B) Close-up images of fields of nuclei in early, mid and late pachytene of the indicated genotypes. Scalebar 5  $\mu$ m.



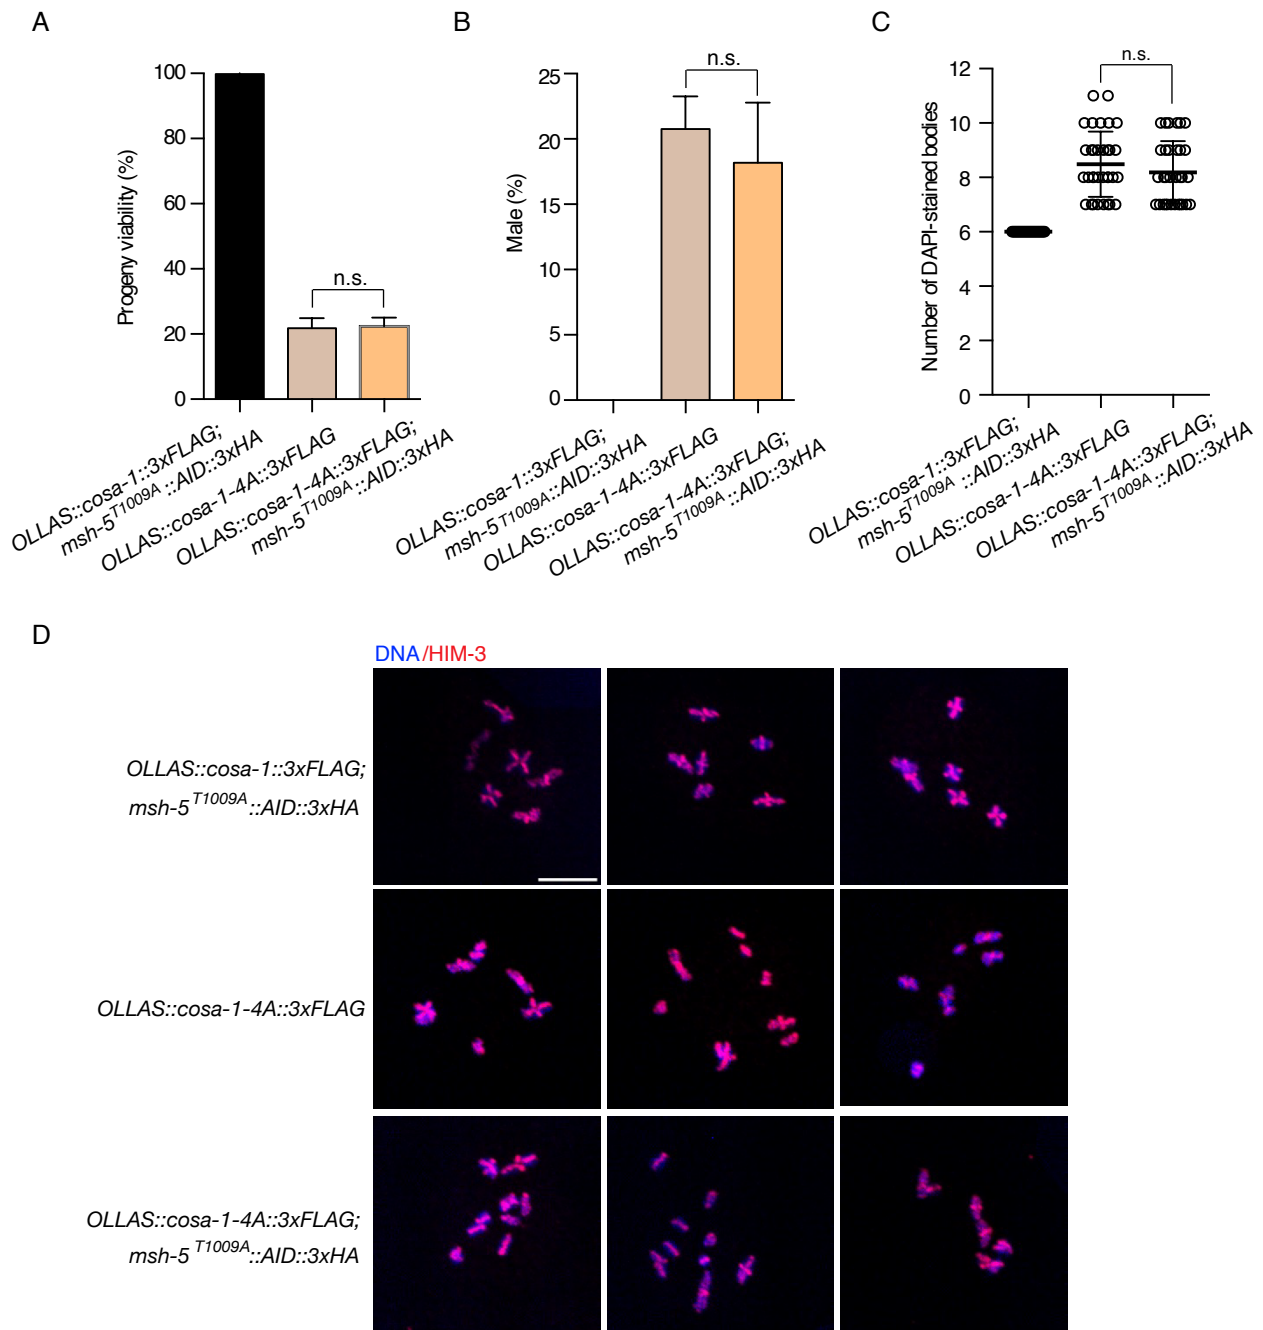

**Figure S9**

***cosa-1-4A* didn't show synthetic phenotypes with *msh-5* phosphomutants**

(A-C) Quantification of the progeny viability, the frequency of male offspring and the number of DAPI-stained bodies in diakinesis nuclei for the indicated genotypes. Statistical analyses were conducted using T-test, n.s., not significant. (D) Representative images of diakinesis nuclei of the indicated genotypes stained with antibodies against HIM-3 (red), counterstained with DAPI (blue). Scalebar, 5  $\mu$ m.

A

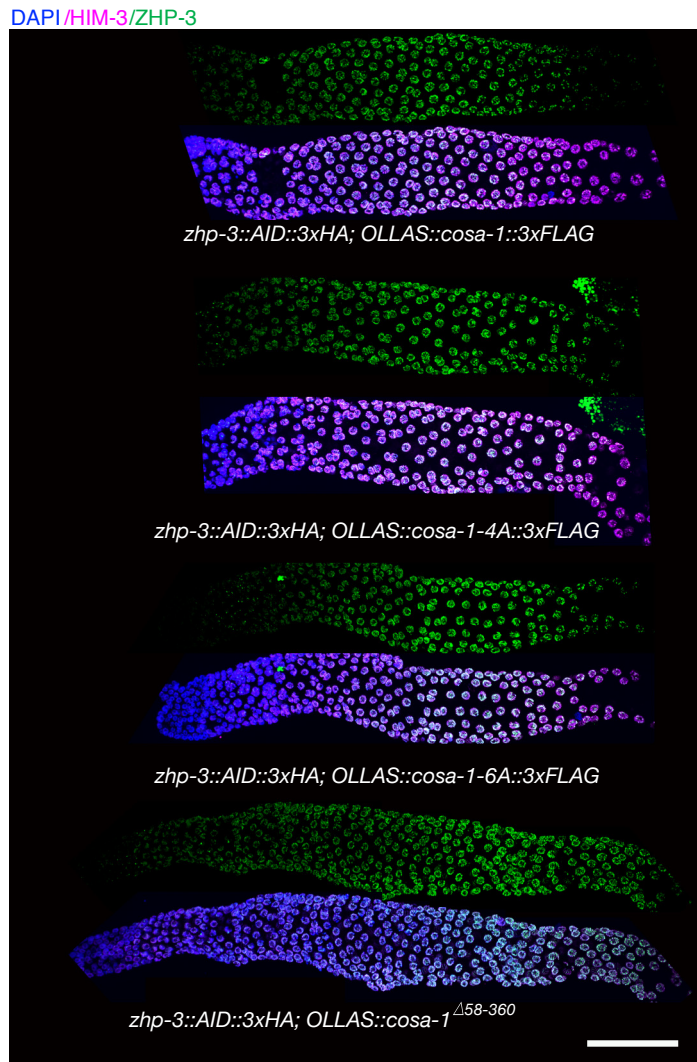

B

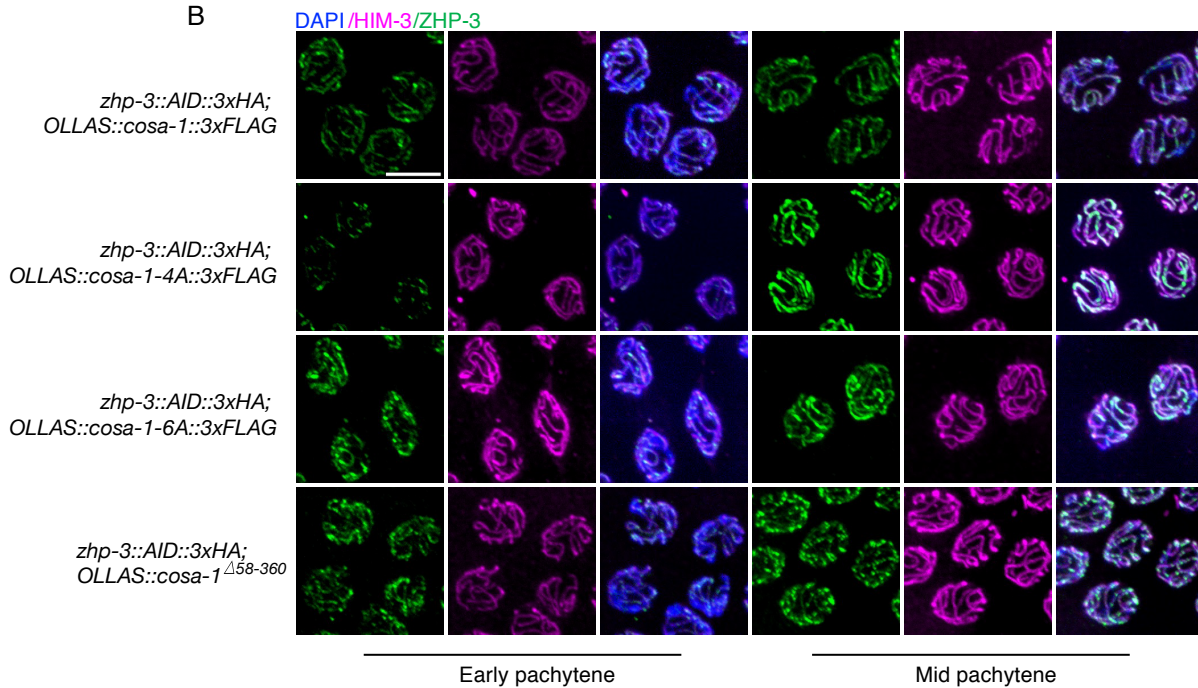

### Figure S10

#### Delayed ZHP-3 relocalization in *cosa-1-4A* and *cosa-1-6A* mutants

(A) Whole gonad immunostaining with antibodies against HA to detect ZHP-3 (green) and HIM-3 (magenta). Scalebar, 50  $\mu$ m. (B) Close-up images of fields of nuclei in early and mid pachytene of the indicated genotypes. Scalebar 5  $\mu$ m.

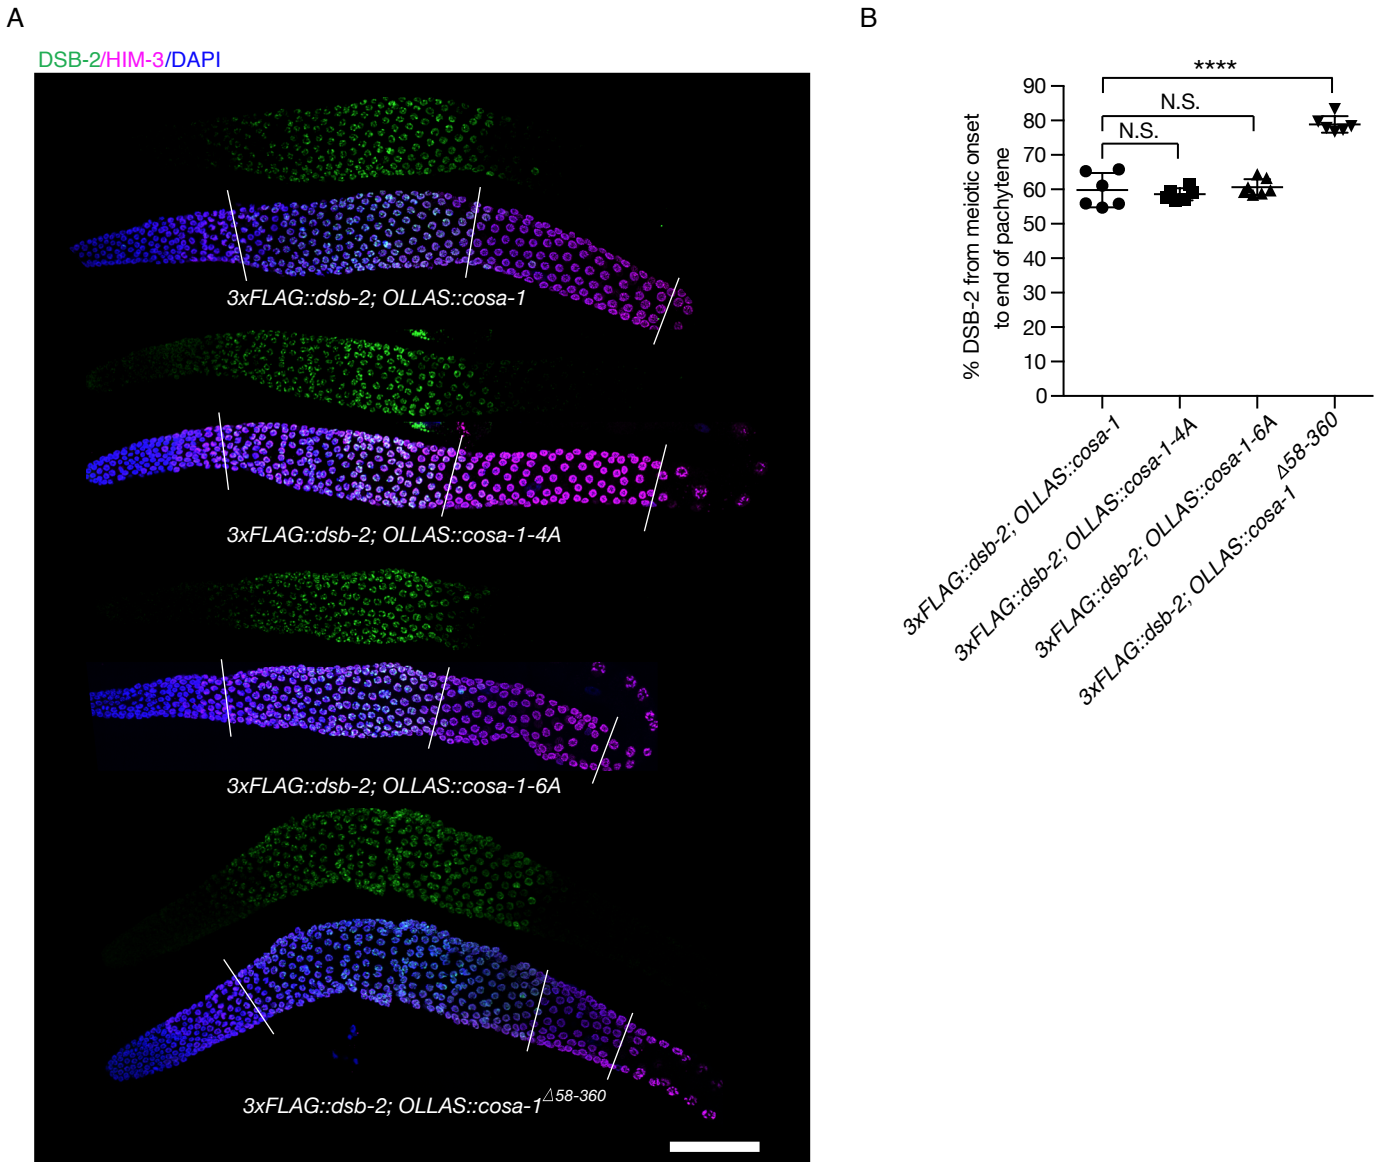

**Figure S11**

**Localization of DSB-2 is normal in in *cosa-1-4A* and *cosa-1-6A* mutants**

(A) Whole gonad immunostaining with antibodies against FLAG to detect DSB-2 (green) and HIM-3 (magenta). Scalebar, 50  $\mu$ m. (B) Quantitative analysis of the DSB-2 positive zone in germlines of the indicated genotypes. The extent of the DSB-2 positive zone was defined as the percentage of the DSB-2 positive region out of the region from meiotic onset to the end of pachytene. Statistical analyses were conducted using T-test, n.s., not significant,  $p > 0.05$ ; \*\*\*\*  $p < 0.001$ .

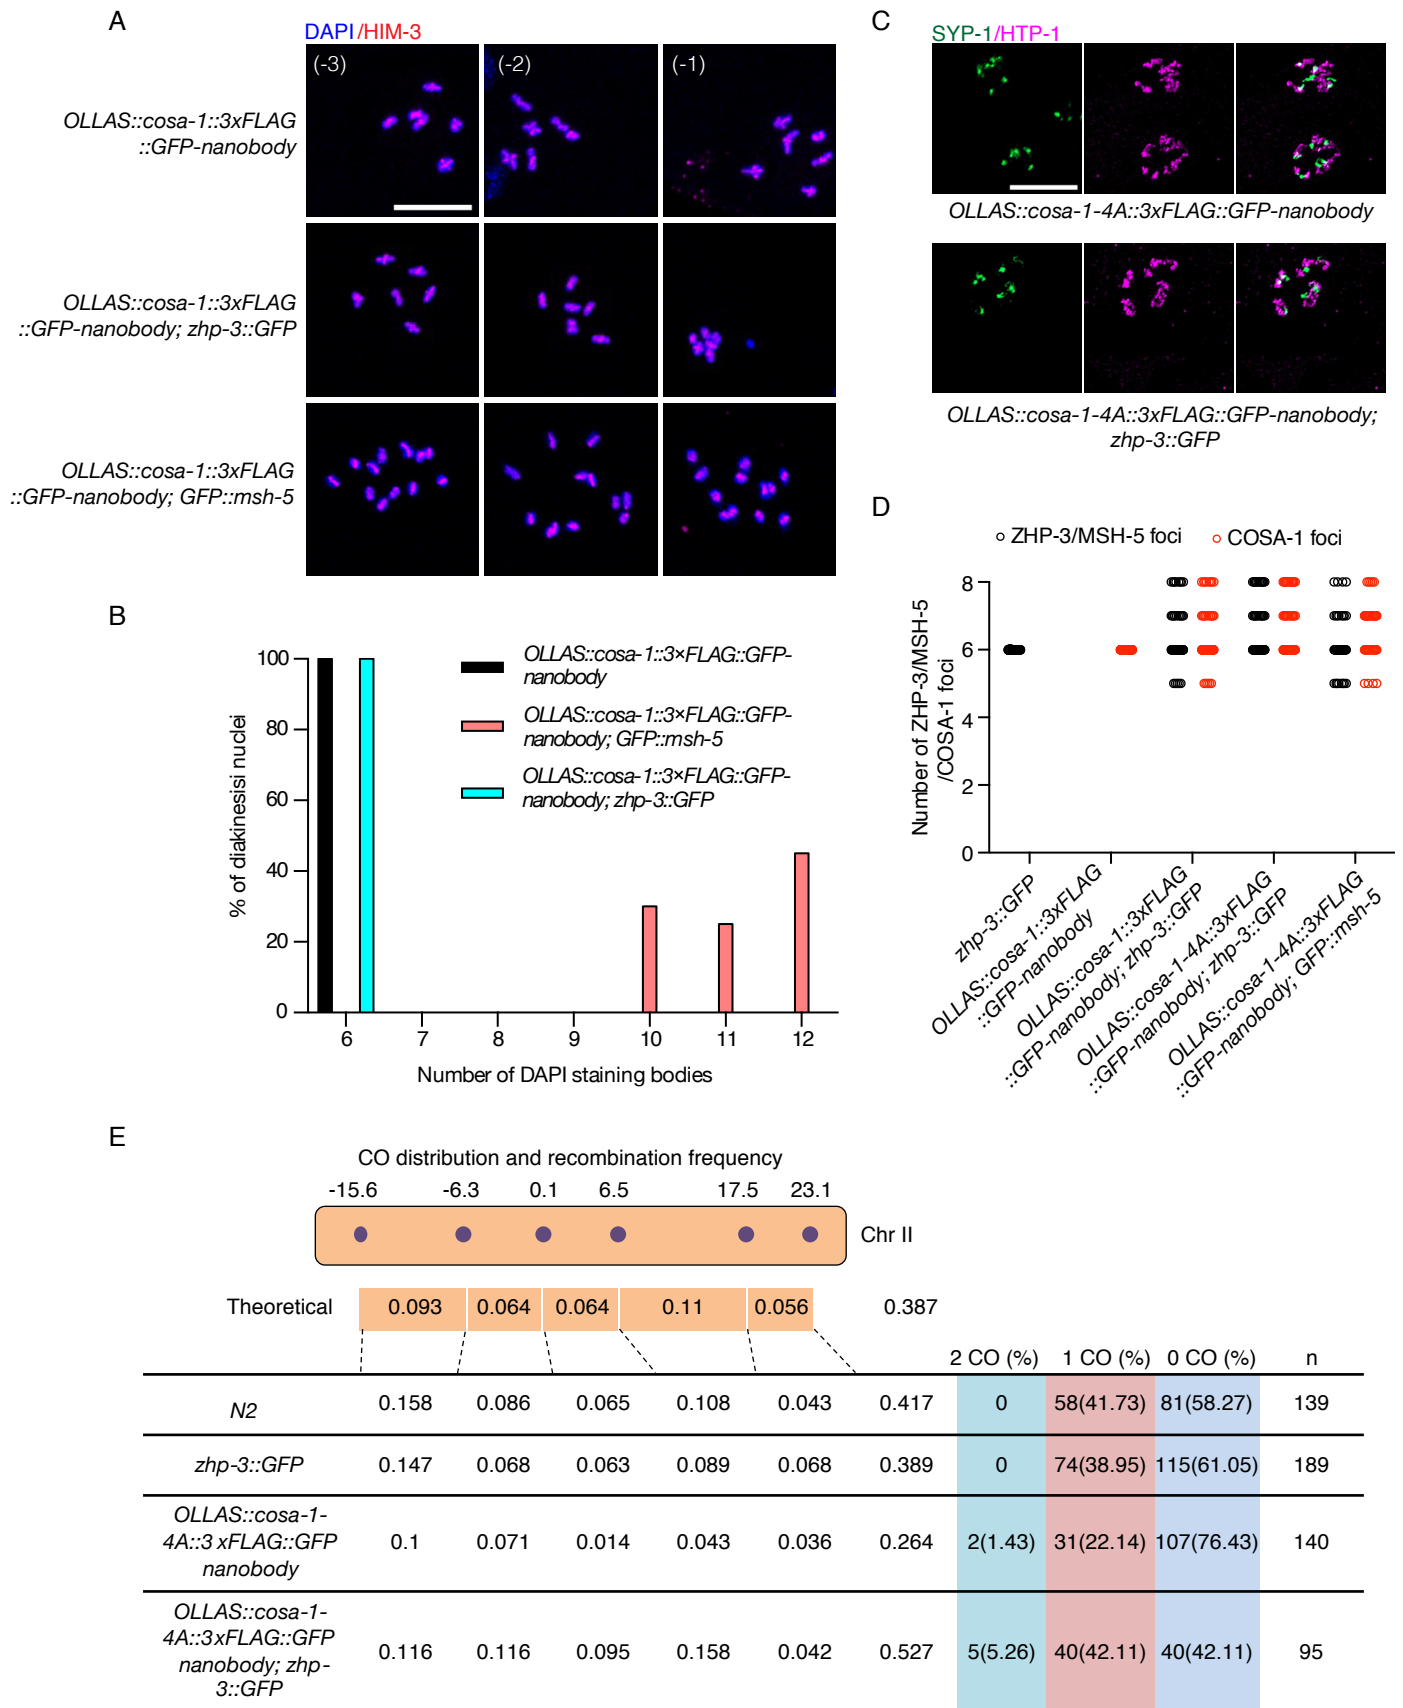

**Figure S12 Artificially tethering COSA-1-4A to ZHP-3 resulted in excess CO designation**

(A) Representative images of diakinesis nuclei of the indicated genotypes stained with antibodies against HIM-3 (red), counterstained with DAPI (blue). Scalebar, 5  $\mu$ m. (B) Quantitative analysis of the number of DAPI-stained bodies in diakinesis nuclei for the indicated genotypes. (C) Representative images of diplotene nuclei of the indicated genotypes stained with antibodies against SYP-1 (green) and HTP-1 (magenta). Scalebar, 5  $\mu$ m. (D) Quantification of COSA-1, ZHP-3 or MSH-5 foci in late pachytene nuclei of the indicated genotypes. (E) Analysis of CO frequency and distribution on chromosome II of the indicated genotypes. n is the number of cross-progeny scored. The frequency of 2 COs, 1 CO or 0 CO per chromosome is indicated in absolute numbers and as percentage (in brackets).

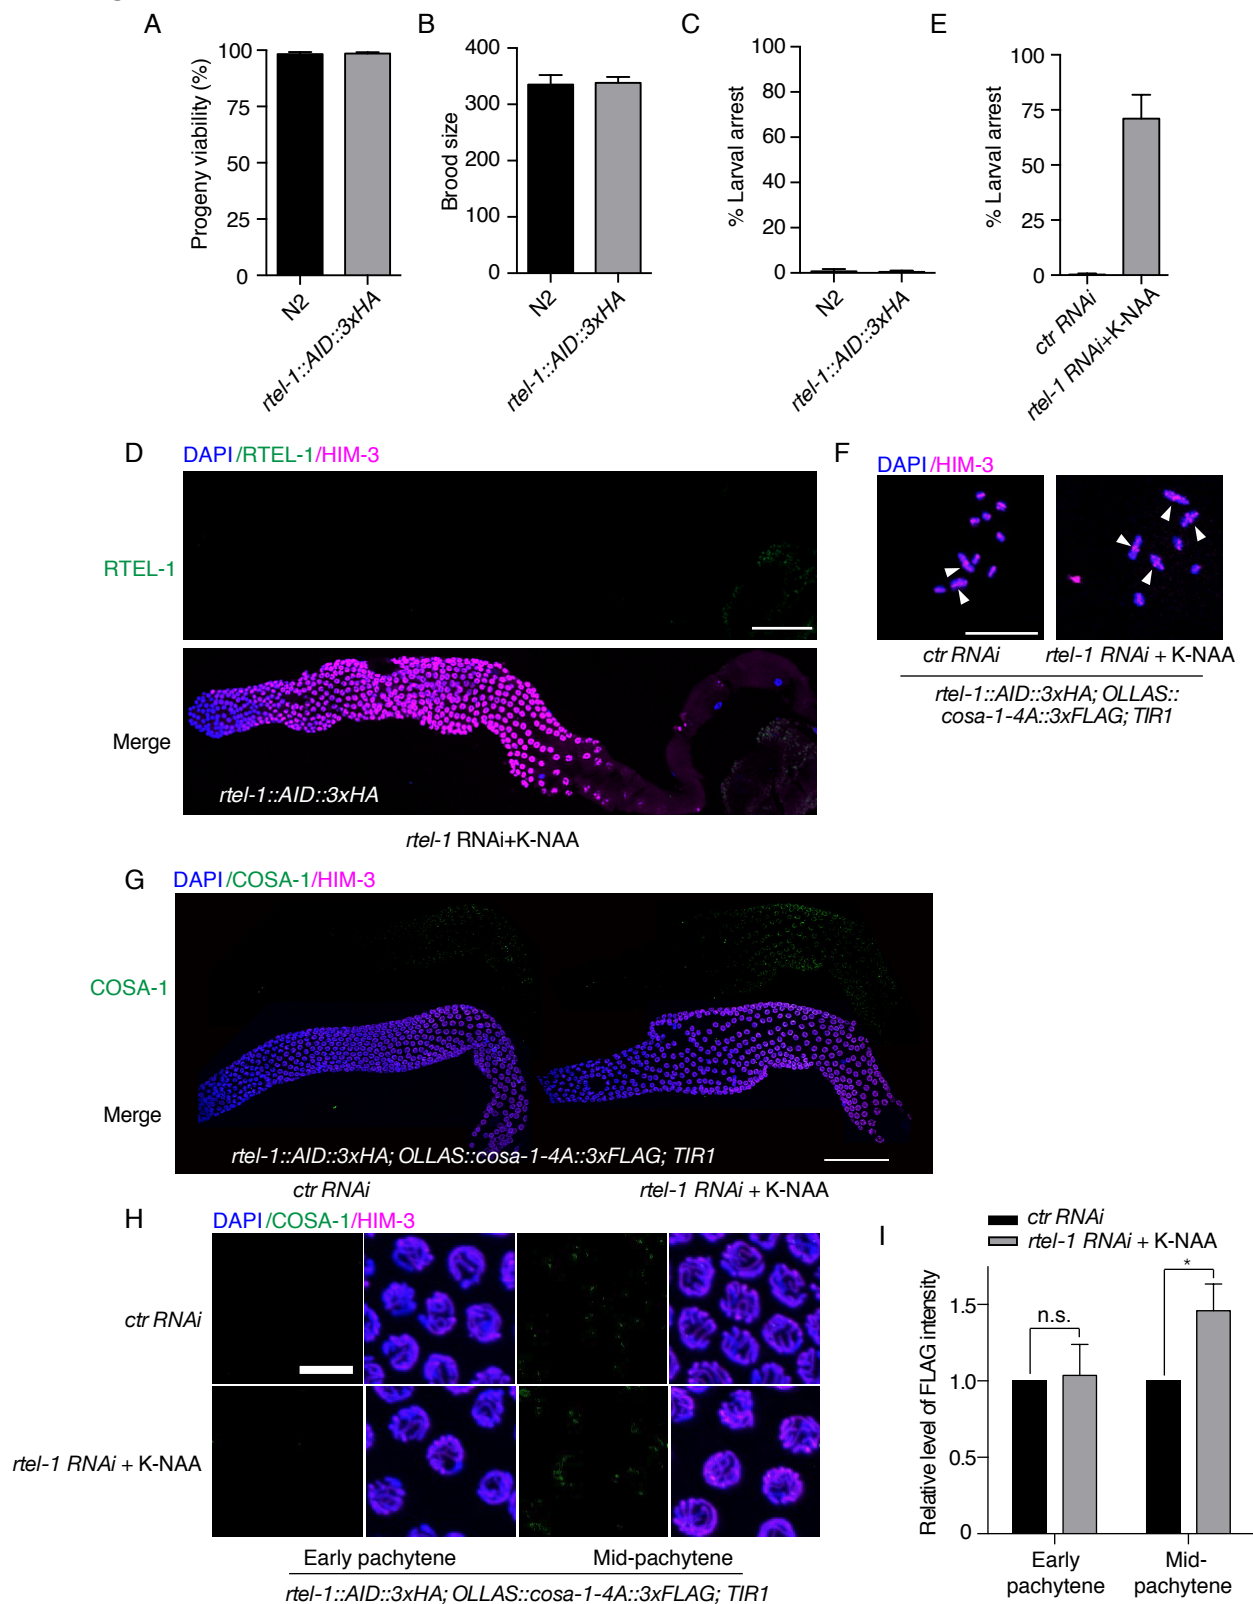

**Figure S13 Analysis of *rtel-1::AID::3xHA* knock-in *C. elegans* strain**

(A-C) Quantification of the progeny viability, brood size and offspring development of *rtel-1::AID::3xHA* knock-in *C. elegans* strain. (D) Whole gonad immunostaining with antibodies against HA to detect RTEL-1 (green) after depletion by RNAi and K-NAA-mediated degradation. Scalebar, 50  $\mu$ m. (E) Depletion of RTEL-1 by RNAi and K-NAA-mediated degradation leads to larval arrest. (F) Depletion of RTEL-1 partially restored bivalents formation in *cosa-1-4A* mutants, as revealed by increased chiasmata (white arrowheads). scalebar 10  $\mu$ m. (G) Whole gonad immunostaining with antibodies against FLAG to detect COSA-1 (green) after depletion of RTEL-1. Scalebar, 50  $\mu$ m. (H) Representative images of early and mid-pachytene nuclei from control and RTEL-1 depleted germline stained with antibodies against FLAG to detect COSA-1 (green) and HIM-3 (magenta), counterstained with DAPI (blue). Scalebar, 5  $\mu$ m. (I) Quantification of the FLAG signal (COSA-1) in nuclei from control and RTEL-1 depleted germline. Statistical analyses were conducted using T-test, \*  $p < 0.05$ .

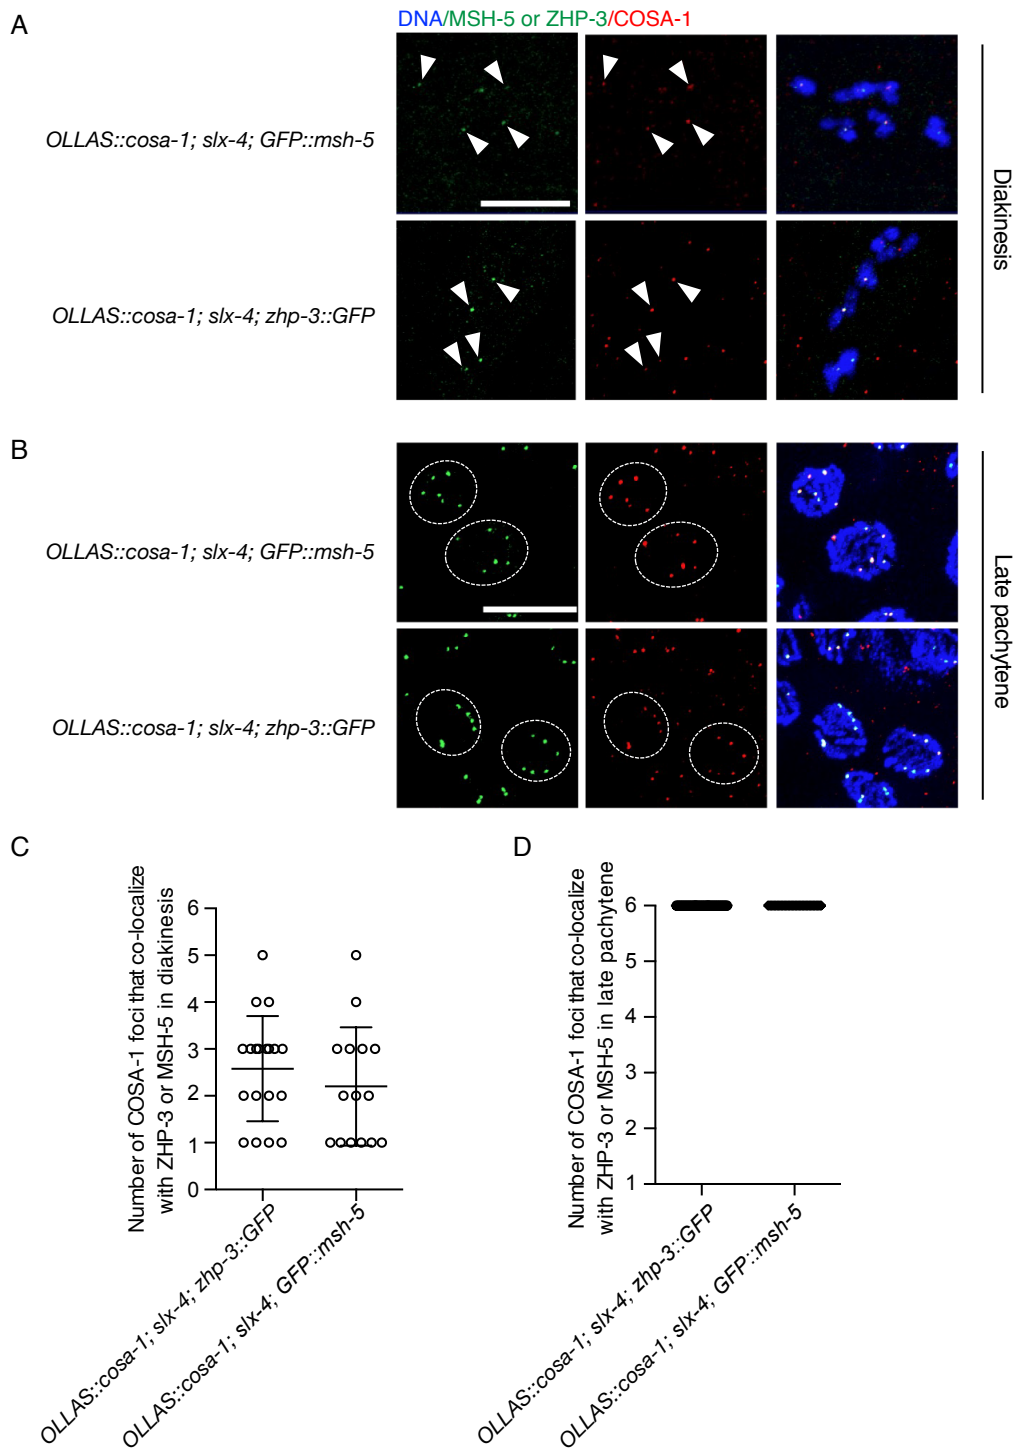

**Figure S14**

**Analysis of MSH-5, ZHP-3 and COSA-1 foci in *slx-4* mutants**

(A) Colocalization of COSA-1 with MSH-5 and ZHP-3 and foci at the junction of 'univalent pairs' in diakinesis oocytes of *slx-4* mutants. scalebar 10  $\mu$ m. (B) MSH-5, ZHP-3 and COSA-1 foci are detected in late pachytene nuclei of *slx-4* mutants. scalebar 10  $\mu$ m. (C) Quantification of COSA-1 foci colocalized with MSH-5 and ZHP-3 at the junction of 'univalent pairs' in diakinesis oocytes. (D) Quantification of COSA-1 foci colocalized with MSH-5 and ZHP-3 in late pachytene nuclei.

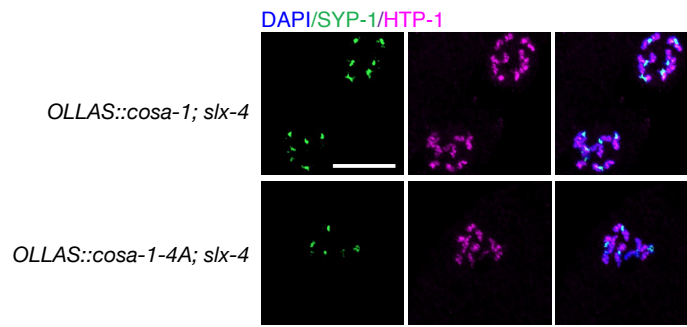

**Figure S15**

**Chromosome remodeling is normal in *cosa-1-4A;slx-4* double mutants**  
scalebar 10  $\mu$ m.

## Supplementary Table 1

### crRNAs, repair templates and genotyping primers for transgenes generated in this study

| Allele               | crRNAs and short/long repair templates & single-stranded templates                                                                                                                                                                                                                                                                                                                                                                                                                                                                                                                                                             | Genotyping primers and fragment sizes                                                                                                                                                                  |
|----------------------|--------------------------------------------------------------------------------------------------------------------------------------------------------------------------------------------------------------------------------------------------------------------------------------------------------------------------------------------------------------------------------------------------------------------------------------------------------------------------------------------------------------------------------------------------------------------------------------------------------------------------------|--------------------------------------------------------------------------------------------------------------------------------------------------------------------------------------------------------|
| <i>OLLAS::cosa-1</i> | 5'- atcacgagaaacatggtgac-3';<br>5'-aagtgtcaATGTCAAGTTCT<br>-3';5'-TCCTGAGCCTCCctttcccatgaggcg<br>tggccgagttcgttagcgaatccgctCATtgacactt<br>cagttcagttttcac -3'                                                                                                                                                                                                                                                                                                                                                                                                                                                                  | F 5'-<br>accaggtgtagtacggta<br>gatt-3'; R 5'-<br>acCTGATTTCGCTG<br>CTGATACG-3';<br>WT, 284 bp;<br>Mutant, 326 bp                                                                                       |
| <i>cosa-1-4A</i>     | 5'- TCATATGACACGCTCCCCGA-3';<br>5'-CAATGAGCCACCGAAAACGC -3';5'-<br>ATCCGAATCTGAAGAAAAATGAGCCA<br>AAAAGCGACAATGAGCCAgCagccAC<br>GCTGGTTTCAATGGccCCTGATgcTTA<br>TGACCCTCGGGGAGCGTGTCATATG<br>ATTTATTGGACGGATTGCATTGCACA<br>AATGGCTGTTGATATTCGAG-3';5'-aca<br>gcaagaaaattgagagaaaactggctgaaaatgga<br>aataattgatttttttgatttttaatttttcagACCGTA<br>AAAAATCCGAATCTGAAGAAAAATGA<br>GCCAAAAGCGACAATGAGCCAgCag<br>ccACGCTGGTTTCAATGGccCCTGATg<br>cTTATGACCCTCGGGGAGCGTGTCAT<br>ATGATTTATTGGACGGATTGCATTGCA<br>CAAATGGCTGTTGATATTCGAGggtgtttat<br>atcggaaattcaatgtttatattgcaaaaattcgtaaatt<br>tcaaggttttaaccttaaaaattgggaaaattaggc<br>-3' | F 5'-<br>AGCGACAATGAG<br>CCAgCagcc-3'; R<br>5'-<br>CGGTGAATCGAA<br>CCTCATTGGG-3';<br>Mutant, 409 bp<br>F 5'-<br>AGCGACAATGAG<br>CCACCGAAA-3'; R<br>5'-<br>CGGTGAATCGAA<br>CCTCATTGGG-3';<br>WT, 409 bp |
| <i>cosa-1-6A</i>     | 5'- TCATATGACACGCTCCCCGA-3';<br>5'-CAATGAGCCACCGAAAACGC<br>-3';5'-ATCCGAATCTGAAGAAAAATGA<br>GCCAAAAGCGACAATGAGCCAgCag<br>ccACGCTGGTTTCAATGGcAgCcGcagc<br>TTATGACCCTCGGGGAGCGTGTCATA<br>TGATTTATTGGACGGATTGCATTGCA<br>CAAATGGCTGTTGATATTCGAG -3'; 5'-<br>acagcaagaaaattgagagaaaactggctgaaaat<br>ggaaataattgatttttttgatttttaatttttcagACC                                                                                                                                                                                                                                                                                         | F 5'-<br>GTTTCAATGGcAg<br>CcGcagc-3'; R 5'-<br>CGGTGAATCGAA<br>CCTCATTGGG-3';<br>Mutant, 382 bp<br>F 5'-<br>GTTTCAATGGAA<br>CCTGATTT-3'; R<br>5'-                                                      |



|                                  |                                                                                                                                                                                                                                                                                                                                                                                                                                                                                                                                                                             |                                                                                                                                       |
|----------------------------------|-----------------------------------------------------------------------------------------------------------------------------------------------------------------------------------------------------------------------------------------------------------------------------------------------------------------------------------------------------------------------------------------------------------------------------------------------------------------------------------------------------------------------------------------------------------------------------|---------------------------------------------------------------------------------------------------------------------------------------|
|                                  | <p>GTAAAAAATCCGAATCTGAAGAAAAA<br/> TGAGCCAAAAAGCGACAATGAGCCA<br/> gCagccACGCTGGTTTCAATGGcAgCc<br/> GcagcTTATGACCCTCGGGGAGCGTG<br/> TCATATGATTTATTGGACGGATTGCAT<br/> TGCACAAATGGCTGTTGATATTCGAG<br/> gtgtttatatcggaaattcaatgtttatattgcaaaaattc<br/> gtaaattcaaggttttaaccttaaaaattgggaaaatt<br/> aggc-3'</p>                                                                                                                                                                                                                                                                  | <p>CGGTGAATCGAA<br/> CCTCATTGGG-3';<br/> WT, 382 bp</p>                                                                               |
| <i>cosa-1</i> <sup>Δ41-53</sup>  | <p>5'- TCATATGACACGCTCCCCGA-3';<br/> 5'-CAATGAGCCACCGAAAACGC<br/> -3';5'-ATCCGAATCTGAAGAAAAATGA<br/> GCCAAAAAGCGACAATTATGACCCTC<br/> GGGGAGCGTGTTCATATGATTTATTGG<br/> ACGGATTGCATTGCACAAATGGCTGT<br/> TGATATTCGAG -3';<br/> 5'-acagcaagaaaattgagagaaaactggctgaa<br/> aatggaaataattgattttttttgatttttaattttcagA<br/> CCGTAAAAAATCCGAATCTGAAGAAA<br/> AATGAGCCAAAAAGCGACAATTATGA<br/> CCCTCGGGGAGCGTGTTCATATGATTT<br/> ATTGGACGGATTGCATTGCACAAATG<br/> GCTGTTGATATTCGAGgtgtttatatcggaaa<br/> ttcaatgtttatattgcaaaaattcgtaaatttcaaggttt<br/> taaccttaaaaattgggaaaattaggc-3'</p> | <p>F 5'-<br/> GCAGCGAATCAG<br/> gttcgaaat-3'; R 5'-<br/> gaatttccgatataaaca<br/> cCTCG-3'; WT, 304<br/> bp; Mutant, 265 bp</p>        |
| <i>cosa-1</i> <sup>Δ58-360</sup> | <p>CRISPR/Cas9 screen identified a<br/> frameshift mutation in <i>cosa-1</i>, which had<br/> a stop codon at 58 site.</p>                                                                                                                                                                                                                                                                                                                                                                                                                                                   | <p>F 5'-<br/> GCAGCGAATCAG<br/> gttcgaaat-3'; R 5'-<br/> gaatttccgatataaaca<br/> cCTCG-3'; WT, 304<br/> bp; Mutant, 439 bp</p>        |
| <i>cosa-1::3×FL<br/> AG</i>      | <p>5'- cagagatggtagTTACGAGG-3';<br/> 5'-GTATTCCGGAATGCAGCACCTCCT<br/> CGGGATCGGACTATAAAGATCACGAC<br/> GGAGATTACAAGGACCATGATATCGA<br/> CTACAAGGACGACGACGACAAGTAAc<br/> taccatctctgacagcacctctttgtcgccgatt<br/> -3';5'-GCGCGAAAAAGgtaactgctggccga<br/> gtttttctaggccacgcgtggcaattttacaattaattatt<br/> ttttattttcagAATGAGAGTATTCCGGAA<br/> TGCAGCACCTCCTCGGGATCGGACT<br/> ATAAAGATCACGACGGAGATTACAAG<br/> GACCATGATATCGACTACAAGGACGA<br/> CGACGACAAGTAActaccatctctgacagca</p>                                                                                                  | <p>F 5'-<br/> GTGACAATGCTTA<br/> TGTCGAACCAT-3'<br/> ; R 5'-<br/> gtggtgcaatgagtacgt<br/> gac-3'; WT, 407 bp;<br/> Mutant, 479 bp</p> |

|                                    |                                                                                                                                                                                                                                                                                                                                                                                                                                                                                                                                                                                                                                                                                                                                                                                                                                                                                                                                                                                                                                                                                                                                                     |                                                                                                                     |
|------------------------------------|-----------------------------------------------------------------------------------------------------------------------------------------------------------------------------------------------------------------------------------------------------------------------------------------------------------------------------------------------------------------------------------------------------------------------------------------------------------------------------------------------------------------------------------------------------------------------------------------------------------------------------------------------------------------------------------------------------------------------------------------------------------------------------------------------------------------------------------------------------------------------------------------------------------------------------------------------------------------------------------------------------------------------------------------------------------------------------------------------------------------------------------------------------|---------------------------------------------------------------------------------------------------------------------|
|                                    | cctctttgtcgccgattccactggtcgcggctcgttccact<br>gcaacaaattattgatttttattgcatgtacatattgaa<br>tgcacat -3'                                                                                                                                                                                                                                                                                                                                                                                                                                                                                                                                                                                                                                                                                                                                                                                                                                                                                                                                                                                                                                                 |                                                                                                                     |
| <i>cosa-1::3xH<br/>A::Turbo ID</i> | 5'- cagagatggttagTTACGAGG-3';<br>5'-TACCCATACGACGTCCCAGACTAC<br>GCCTACCCATATGATGTCCCGGATTA<br>CGCTTACCCATACGATGTTCCAGATTA<br>CGCTAAGGATAACACCGTCCCCTTA<br>AGCTTATCGCCCTTCTTGCTAACGGA<br>GAATTCCACTCTGGAGAGCAACTTG<br>GAGAGACTCTTGGAAATGTCCCGTGC<br>TGCTATCAACAAGCATATCCAACTCT<br>TCGTGATTGGGGAGTTGATGTTTTCA<br>CTGTTCCAGGTAAGTTTAAACATATAT<br>ATACTAACTAACCTGATTATTTAAATT<br>TTCAGGAAAGGGATACTCTTCCAG<br>AGCCAATCCCCTTCTTAACGCTAAG<br>CAAATCCTTGGACAACCTTGATGGAGG<br>ATCCGTCGCTGTCCTTCCAGTTGTTG<br>ATTCCACCAACCAATACCTTCTTGATC<br>GTATCGGAGAGCTTAAGTCTGGAGA<br>CGCTTGCATCGCTGAATACCAGCAG<br>GCTGGTAGAGGTAAGTTTAAACAGTT<br>CGGTACTAACTAACCATACATATTTAA<br>ATTTTCAGGAAGTCGTGGCCGTAAT<br>GGTTTAGTCCTTTCGGCGCCAACCTC<br>TACCTTAGTATGTTTTGGCGTCTGAAA<br>AGAGGACCTGCGGCGATAGGCTTGG<br>GTCCAGTGATCGGTATTGTTATGGCC<br>GAGGCGCTGCGAAAGCTGGGAGCT<br>GATAAGGTTTCGTGTTAAGTGGCCAAA<br>CGATCTTTACCTTCAAGACCGTAAGC<br>TTGCTGGAATCCTTGTGAGCTTGCT<br>GGAATCACCGGAGACGCTGCTCAA<br>TCGTTATCGGAGCTGGAATCAACGTT<br>GCTATGCGTCGTGTTGAGGTAAGTTT<br>AAACATGATTTTACTAACTAACTAATCT<br>GATTTAAATTTTCAGGAGTCTGTTGTT<br>AACCAAGGATGGATCACTCTTCAAGA<br>GGCTGGAATCAACCTTGATCGTAACA | F 5'-<br>GTGACAATGCTTA<br>TGTCGAACCAT-3'<br>; R 5'-<br>gtggtgcaatgagtacgt<br>gac-3'; WT, 407 bp;<br>Mutant, 1598 bp |

CCCTTGCTGCCACCCTTATCCGTGAG  
CTTCGTGCTGCCCTTGAACTTTTCGA  
GCAAGAGGGACTTGCTCCATACCTTC  
CACGTTGGGAGAAGCTTGATAACTTC  
ATCAACCGCCCAGTTAAGCTTATCAT  
CGGAGATAAGGAAATCTTCGGAATCT  
CTCGCGGAATCGATAAGCAAGGAGC  
TCTTCTTCTTGAGCAAGATGGAGTTA  
TTAAACCATGGATGGGAGGAGAAATT  
TCCCTTCGTTCCGCCGAGAAG  
-3';5'-gcaaatTTTTgataaatcaatagttcccgga  
atTTTTtagcgggaattcaaatttctcaaaaatTTTTgcg  
gaaattcaaatTTTTcagaaaagtttggcgggaaaat  
attggaatttctaaaaatatttggcggaaattcaaat  
ttctcagaaaagtttggcgggaattcaaatttctcac  
aaaaattggagcaccttctcaaatTTgaaccaa  
aattcacgaaattcgctatTTggagcagTTTTTTgagt  
atTTatatcaatTTcagATTAACATCTCAA  
ATTCAAATGGGATATCCAATTGCTCGC  
CGCCGCAACCGTCCAACTGCTTAC  
ATTCTACTTCTCGGCACTTCTCAAATT  
GCCAATGTTTCAGTGATAATCAATAAT  
TTATTGAGATGTGACAATGCTTATGTC  
GAACCATTAAAGCAATCGATTATAGAG  
CTCGCCTGCGCGAAAAAGgtaactgctgg  
ccgagTTTTctaggccacgcgtggcaatttacaatta  
attTTTTtatttattcagAATGAGAGTATTCCG  
GAATGCAGCACCTCCTCGTACCCATA  
CGACGTCCCAGACTACGCCTACCCAT  
ATGATGTCCCGGATTACGCTTACCCA  
TACGATGTTCCAGATTACGCTAAGGAT  
AACACCGTCCCCTTAAGCTTATCGC  
CCTTCTTGCTAACGGAGAATTCCACT  
CTGGAGAGCAACTTGGAGAGACTCT  
TGGAATGTCCCGTGCTGCTATCAACA  
AGCATATCCAACTCTTCGTGATTGG  
GGAGTTGATGTTTTCACTGTTCCAGG  
TAAGTTTAAACATATATACTAACTAA  
CCCTGATTATTTAAATTTTCAGGAAAG  
GGATACTCTTCCAGAGCCAATCCC  
ACTTCTTAACGCTAAGCAAATCCTTG  
GACAACTTGATGGAGGATCCGTGCGC  
TGTCCTTCCAGTTGTTGATTCCACCA  
ACCAATACCTTCTTGATCGTATCGGA

GAGCTTAAGTCTGGAGACGCTTGCAT  
CGCTGAATACCAGCAGGCTGGTAGA  
GGTAAGTTTAAACAGTTCGGTACTAA  
CTAACCATACATATTTAAATTTTCAGG  
AAGTCGTGGCCGTAATGGTTTAGTC  
CTTTCGGCGCCAACCTCTACCTTAGT  
ATGTTTTGGCGTCTGAAAAGAGGACC  
TGCGGCGATAGGCTTGGGTCCAGTG  
ATCGGTATTGTTATGGCCGAGGCGCT  
GCGAAAGCTGGGAGCTGATAAGGTT  
CGTGTTAAGTGGCCAAACGATCTTTA  
CCTTCAAGACCGTAAGCTTGCTGGAA  
TCCTTGTCGAGCTTGCTGGAATCACC  
GGAGACGCTGCTCAAATCGTTATCGG  
AGCTGGAATCAACGTTGCTATGCGTC  
GTGTTGAGGTAAGTTTAAACATGATT  
TACTAACTAACTAATCTGATTTAAATTT  
TCAGGAGTCTGTTGTTAACCAAGGAT  
GGATCACTCTTCAAGAGGCTGGAATC  
AACCTTGATCGTAACACCCTTGCTGC  
CACCTTATCCGTGAGCTTCGTGCTG  
CCCTTGAACTTTTCGAGCAAGAGGG  
ACTTGCTCCATACCTTCCACGTTGGG  
AGAAGCTTGATAACTTCATCAACCGC  
CCAGTTAAGCTTATCATCGGAGATAA  
GGAAATCTTCGGAATCTCTCGCGGAA  
TCGATAAGCAAGGAGCTCTTCTTCTT  
GAGCAAGATGGAGTTATTAACCATG  
GATGGGAGGAGAAATTTCCCTTCGTT  
CCGCCGAGAAGTAActaccatctctgacagc  
acctcttctgcccattccactggtcgcggtcgttca  
ctgcaacaaattattgattttattgtcatgtaccatattg  
aatgcataatgttaatttaataaattggatttagtttat  
aaatatgtttcattttcaatgaaatcatcaaaaaattca  
aatttgcgcgtaaagtatggagtttcgcaatttcctgtc  
acgtactcattgcaccacaatttacgcgcattatctcta  
gaattttgtagaaatcttaaatttgcgtgaaaaatagt  
gatttttaacgaaaaattgtaaaaattcgaagaaagt  
aaattttaaaaattaatttgcgcgtaaagtatagtgttt  
aacattttctgccacttattaatacaccacatttcacgc  
gcaaattcaggagtttt -3'

|                                                                   |                                                                                                                                                                                                                                                                                                                                                                                                                                                                                                                                                                                                                                                                                                                                                                                                                                                                                                                                                                                                                                                                                                                                                                                                                                                                                                                                                                                                                                               |                                                                                                                                |
|-------------------------------------------------------------------|-----------------------------------------------------------------------------------------------------------------------------------------------------------------------------------------------------------------------------------------------------------------------------------------------------------------------------------------------------------------------------------------------------------------------------------------------------------------------------------------------------------------------------------------------------------------------------------------------------------------------------------------------------------------------------------------------------------------------------------------------------------------------------------------------------------------------------------------------------------------------------------------------------------------------------------------------------------------------------------------------------------------------------------------------------------------------------------------------------------------------------------------------------------------------------------------------------------------------------------------------------------------------------------------------------------------------------------------------------------------------------------------------------------------------------------------------|--------------------------------------------------------------------------------------------------------------------------------|
| <p><i>cosa-1::3×FL</i><br/><i>AG::GFP</i><br/><i>nanobody</i></p> | <p>5'- cagagatggttagTTACGAGG-3';<br/>5'-GTATTCCGGAATGCAGCACCTCCT<br/>CGGGATCGGACTATAAAGATCACGAC<br/>GGAGATTACAAGGACCATGATATCGA<br/>CTACAAGGACGACGACGACAAGGGC<br/>TCAGATCAAGTCCAACCTGGTGGAGT<br/>CTGGTGGCGCTTTGGTGCAGCCAGG<br/>TGGCTCTCTGCGTTTGTCTGTGCC<br/>GCTTCTGGCTTCCCAGTGAACCGCTA<br/>TTCCATGCGCTGGTATCGCCAGGCTC<br/>CAGGCAAAGAGCGTGAGTGGGTAGC<br/>CGGTATGTCCAGCGCGGGTGATCGT<br/>AGCTCCTATGAAGACTCCGTGAAGG<br/>GCCGTTTCACCATCAGCCGTGACGA<br/>TGCCCGTAACACGGTGTATCTGCAAA<br/>TGAACAGCTTGAAACCTGAAGATACG<br/>GCCGTGTATTACTGTAATGTGAACGT<br/>GGGCTTCGAGTATTGGGGCCAAGGC<br/>ACCCAGGTCACCGTCTCCAGCTAAct<br/>accatctctgacagcacctcttctgc<br/>-3';5'-GCGCGAAAAAGgtaactgctggccga<br/>gtttttctaggccacgcgtggcaattttacaattaattatt<br/>ttttattttcagAATGAGAGTATTCCGGAA<br/>TGCAGCACCTCCTCGGGATCGGACT<br/>ATAAAGATCACGACGGAGATTACAAG<br/>GACCATGATATCGACTACAAGGACGA<br/>CGACGACAAGGGCTCAGATCAAGTC<br/>CAACTGGTGGAGTCTGGTGGCGCTT<br/>TGGTGCAGCCAGGTGGCTCTCTGCG<br/>TTTGTCTGTGCCGCTTCTGGCTTCC<br/>CAGTGAACCGCTATTCCATGCGCTGG<br/>TATCGCCAGGCTCCAGGCAAAGAGC<br/>GTGAGTGGGTAGCCGGTATGTCCAG<br/>CGCGGGTGATCGTAGCTCCTATGAA<br/>GACTCCGTGAAGGGCCGTTTCACCA<br/>TCAGCCGTGACGATGCCCGTAACAC<br/>GGTGTATCTGCAAATGAACAGCTTGA<br/>AACCTGAAGATACGGCCGTGTATTAC<br/>TGTAATGTGAACGTGGGCTTCGAGTA<br/>TTGGGGCCAAGGCACCCAGGTCACC<br/>GTCTCCAGCTAActaccatctctgacagcacct<br/>cttctgcgccgattccactggtcgcggctcgttactgc<br/>aacaattattgattttattgtcatgtaccatattgaatg<br/>cat -3'</p> | <p>F<br/>5'-GTGACAATGCT<br/>TATGTCTGAACCAT<br/>-3'; R<br/>5'-gtggtgcaatgagta<br/>cgtgac-3'; WT, 407<br/>bp; Mutant, 833 bp</p> |
|-------------------------------------------------------------------|-----------------------------------------------------------------------------------------------------------------------------------------------------------------------------------------------------------------------------------------------------------------------------------------------------------------------------------------------------------------------------------------------------------------------------------------------------------------------------------------------------------------------------------------------------------------------------------------------------------------------------------------------------------------------------------------------------------------------------------------------------------------------------------------------------------------------------------------------------------------------------------------------------------------------------------------------------------------------------------------------------------------------------------------------------------------------------------------------------------------------------------------------------------------------------------------------------------------------------------------------------------------------------------------------------------------------------------------------------------------------------------------------------------------------------------------------|--------------------------------------------------------------------------------------------------------------------------------|

|                                 |                                                                                                                                                                                                                                                                                                                                                                                                                                                                                                                                                                                                                                                                                                                                                                                                                                                                                                                                               |                                                                                                                                         |
|---------------------------------|-----------------------------------------------------------------------------------------------------------------------------------------------------------------------------------------------------------------------------------------------------------------------------------------------------------------------------------------------------------------------------------------------------------------------------------------------------------------------------------------------------------------------------------------------------------------------------------------------------------------------------------------------------------------------------------------------------------------------------------------------------------------------------------------------------------------------------------------------------------------------------------------------------------------------------------------------|-----------------------------------------------------------------------------------------------------------------------------------------|
| <p><i>msh-5::AID::3×HA</i></p>  | <p>5'-CGAACGATCTATCGTCTCAT-3';<br/> 5'-GCaGATGAaACtATAGATCGTTCTGA<br/> AAAGAAGTGGAGGCTCAGGAatgccta<br/> aagatccagccaaacctccggccaaggcacaagtt<br/> gtgggatggccaccggtgagatcataccggaagaa<br/> cgtgatggtttctgccaataatcaagcgggtggccc<br/> gaggcggcggcgttcgtgaagGGAGGCTCAG<br/> GATACCCATACGACGTCCCAGACTAC<br/> GCCTACCCATATGATGTCCCGGATTA<br/> CGCTTACCCATACGATGTTCCAGATTA<br/> CGCTTAA<br/> -3';5'-GAGGAAGATGATGAGTTCTTGA<br/> AGAGTTTCTTGAACAGAAGGATCT<br/> CTCCATATCGATACGAGCGCaGATGA<br/> aACtATAGATCGTTCTGAAAAGAAGTGG<br/> AGGCTCAGGAatgcctaaagatccagccaaa<br/> cctccggccaaggcacaagttgtgggatggccaccg<br/> gtgagatcataccggaagaacgtgatggtttctgcc<br/> aaaaatcaagcgggtggcccggaggcggcggcgttc<br/> gtgaagGGAGGCTCAGGATACCCATAC<br/> GACGTCCCAGACTACGCCTACCCATA<br/> TGATGTCCCGGATTACGCTTACCCAT<br/> ACGATGTTCCAGATTACGCTTAAtttata<br/> taattagaatttctgttttctgtatgttcaatctgttcaa<br/> tgtatttcgttttctgttttaattattatagcgcattttaata<br/> aatac -3'</p> | <p>F 5'-<br/> GAAAAGAATTGC<br/> AGTGCTCCTGT-3'<br/> ; R 5'-<br/> cgttggaactattgcacg<br/> ag-3'; WT, 286 bp;<br/> Mutant, 526 bp</p>     |
| <p><i>rte1-1::AID::3×HA</i></p> | <p>5'- TTGCTCCAACGTTCTCCGAT-3';<br/> 5'-ttaatttccagCTTGCTCCAACGTTCTC<br/> CGATCaGAAGACAAAATGAAATATCT<br/> GAAAAAGGCGCTTGAATCGAAGATC<br/> CACACAGGAGGCTCAGGAatgcctaaag<br/> atccagccaaacctccggccaaggcacaagttgtg<br/> gatggccaccggtgagatcataccggaagaacgtg<br/> atggtttctgccaataatcaagcgggtggcccgggag<br/> gcggcggcgttcgtgaagGGAGGCTCAGGA<br/> TACCCATACGACGTCCCAGACTACGC<br/> CTACCCATATGATGTCCCGGATTACG<br/> CTTACCCATACGATGTTCCAGATTACG<br/> CTTAA<br/> -3';5'-TGTTCCGCACAAGGCTGATTTG<br/> TTTATTGgtttgttagaattcaaattttattcaacia<br/> aaaaatacaattaatttccagCTTGCTCCAAC<br/> GTTCTCCGATCaGAAGACAAAATGAA<br/> ATATCTGAAAAAGGCGCTTGAATCGA</p>                                                                                                                                                                                                                                                                                                    | <p>F 5'-<br/> GCTGAAAGTATC<br/> AGATGGGATG-3';<br/> R 5'-<br/> tgggaagtgaccatgag<br/> atcgcacat-3'; WT, 342<br/> bp; Mutant, 582 bp</p> |

|                                      |                                                                                                                                                                                                                                                                                                                                                                                                                    |                                                                                                                                                                                                                                 |
|--------------------------------------|--------------------------------------------------------------------------------------------------------------------------------------------------------------------------------------------------------------------------------------------------------------------------------------------------------------------------------------------------------------------------------------------------------------------|---------------------------------------------------------------------------------------------------------------------------------------------------------------------------------------------------------------------------------|
|                                      | <p>AGATCCACACAGGAGGCTCAGGAatg<br/> cctaaagatccagccaaacctccggccaaggcaca<br/> agttgtgggatggccaccggtgagatcataccggaa<br/> gaacgtgatggttctgccaataatcaagcgggtggc<br/> ccggaggcggcggcggttcgtaagGGAGGCT<br/> CAGGATACCCATACGACGTCCCAGAC<br/> TACGCCTACCCATATGATGTCCCGGA<br/> TTACGCTTACCCATACGATGTTCCAGA<br/> TTACGCTTAAttttcatttttttttctctcgtaacat<br/> ttctaactctctagatcctttacatgtaaacattattg<br/> accggtgtttaat -3'</p> |                                                                                                                                                                                                                                 |
| <i>msh-5-T1009</i><br>A              | <p>5'-TCACCCATTTGGATTGGAGT-3';<br/> single-stranded templates:5'-<br/> ACCACCAGCTTCACCCATTTGGATaG<br/> GtGccGGAATATGTATTGCAGTTTCGAG<br/> TCGAG -3';</p>                                                                                                                                                                                                                                                            | <p>F 5'-<br/> attaggtctcaaatcgag<br/> agg -3'; R 5'-<br/> TCACCCATTTGGA<br/> TaGGtccc -3';<br/> Mutant, 239 bp<br/> F 5'-<br/> attaggtctcaaatcgag<br/> agg -3'; R 5'-<br/> TCACCCATTTGGA<br/> TTGGAcTT -3';<br/> WT, 239 bp</p> |
| <i>3×FLAG::dsb-2</i>                 | <p>5'-agaaaaaaaaATGAGTGCACG -3';<br/> 5'-GGATCGGACTATAAAGATCACGAC<br/> GGAGATTACAAGGACCATGATATCGA<br/> CTACAAGGACGACGACGACAAGGGA<br/> GGCTCAGGATCCACT -3';<br/> 5'-gtttattcaataaataatctcaatttttacagaaaaa<br/> aATGGGATCGGACTATAAAGATCACG<br/> ACGGAGATTACAAGGACCATGATATC<br/> GACTACAAGGACGACGACGACAAGG<br/> GAGGCTCAGGATCCACTAGTGCACG<br/> TGGCCTGAAAGTTGAGATGTACTACA<br/> AATTAGC -3';</p>                       | <p>5'-<br/> aatggctgttaccgtagtt<br/> gt-3';<br/> 5'-acgcgaaaattacC<br/> TCTGCTTC -3';<br/> WT, 186 bp;<br/> Mutant,276 bp</p>                                                                                                   |
| <i>cdk-2::AID::3×</i><br><i>FLAG</i> | <p>5'-acacgatgttaggtatgg -3';<br/> 5'-<br/> GGAGGCTCAGGAatgcctaaagatccagcc<br/> aaacctccggccaaggcacaagttgtgggatggcc<br/> accggtgagatcataccggaagaacgtgatggttcc<br/> tgcaaaaaatcaagcgggtggcccggaggcggcgg<br/> cgttcgtgaagGGATCGGACTATAAAGATC<br/> ACGACGGAGATTACAAGGACCATGAT<br/> ATCGACTACAAGGACGACGACGACA</p>                                                                                                      | <p>5'-GCGCAGAACA<br/> GGgtaaag -3';<br/> 5'-<br/> gaggaaagactcggta<br/> aaaagag-3';<br/> WT, 176 bp;<br/> Mutant, 398bp</p>                                                                                                     |

|                             |                                                                                                                                                                                                                                                                                                                                                                                                                                                                                                                                                                                                                                                                                                                |                                                                                                        |
|-----------------------------|----------------------------------------------------------------------------------------------------------------------------------------------------------------------------------------------------------------------------------------------------------------------------------------------------------------------------------------------------------------------------------------------------------------------------------------------------------------------------------------------------------------------------------------------------------------------------------------------------------------------------------------------------------------------------------------------------------------|--------------------------------------------------------------------------------------------------------|
|                             | AGGGA-3';<br>5'-CTGCTGAACAATCATCAGGAGAAG<br>TCAATCTTCGGAGGCTCAGGAatgccta<br>aagatccagccaaacctccggccaaggcacaagtt<br>gtgggatggccaccggtgagatcataccggaagaa<br>cgtgatggttctgccaataatcaagcggaggcccg<br>gaggcggcggcgttcgtgaagGGATCGGACT<br>ATAAAGATCACGACGGAGATTACAAG<br>GACCATGATATCGACTACAAGGACGA<br>CGACGACAAGGGATAAtatatcatgtcctcc<br>ataacctaatacatcgtgtactat -3';                                                                                                                                                                                                                                                                                                                                               |                                                                                                        |
| <i>zhp-3::AID::3x</i><br>HA | 5'-gagattaaacaTTAATCGG -3';<br>5'-GGAGGCTCAGGAatgcctaaagatccag<br>ccaaacctccggccaaggcacaagttgtgggatgg<br>ccaccggtgagatcataccggaagaacgtgatggtt<br>cctgccaataatcaagcggaggcccgaggcggc<br>ggcgttcgtgaagGGAGGCTCAGGATACC<br>CATACGACGTCCCAGACTACGCCTAC<br>CCATATGATGTCCCGGATTACGCTTA<br>CCCATACGATGTTCCAGATTACGCTTA<br>A -3';<br>5'-<br>GGAAACCGATCAATGGTTCGGAGCTT<br>CATTGGACCCGCCGATGGAGGCTCA<br>GGAatgcctaaagatccagccaaacctccggcca<br>aggcacaagttgtgggatggccaccggtgagatcat<br>accggaagaacgtgatggttctgccaataatcaa<br>gcggaggcccgaggcggcggcgttcgtgaagGG<br>AGGCTCAGGATACCCATACGACGTCC<br>CAGACTACGCCTACCCATATGATGTC<br>CCGGATTACGCTTACCCATACGATGT<br>TCCAGATTACGCTTAAgttttaatctcgtttttt<br>ctgaattcgttcttatttg-3'; | 5'-cgtttcagGATAC<br>CTCGCAC -3';<br>5'-tcagatgtgaactag<br>gtagag -3';<br>WT, 207 bp;<br>Mutant, 447 bp |



## Supplementary Table 2

### List of strains

| Strain # | Strains                                                                                                          | Source                                                |
|----------|------------------------------------------------------------------------------------------------------------------|-------------------------------------------------------|
| sYH_0007 | N2                                                                                                               | Caenorhabditis Genetics Center                        |
| sYH_0067 | <i>mels8[pie-1p::GFP::cosa-1, unc-119(+)] II</i>                                                                 | Yokoo et al., 2012                                    |
| sYH_0087 | <i>zhp-3::GFP V</i>                                                                                              | Bhalla et al, 2018                                    |
| sYH_0224 | <i>OLLAS::cosa-1 III</i>                                                                                         | This study, using the strategy of Janisiw et al, 2018 |
| sYH_0229 | <i>cdk-2::AID::3xFLAG I</i>                                                                                      | This study, using the Haversat et al, 2022            |
| sYH_0059 | <i>GFP::msh-5 IV</i>                                                                                             | Janisiw et al, 2018                                   |
| sYH_0008 | <i>GFP::him-6 IV</i>                                                                                             | Caenorhabditis Genetics Center                        |
| sYH_0293 | <i>OLLAS::cosa-1-4A/qC1 III The P43K44E50F53 of cosa-1 mutated into alanine.</i>                                 | This study                                            |
| sYH_0294 | <i>OLLAS::cosa-1-6A/qC1 III The P43K44E50P51D52F53 of cosa-1 mutated into alanine.</i>                           | This study                                            |
| sYH_0292 | <i>OLLAS::cosa-1<sup>Δ41-53</sup>/qC1 III Truncated mutation of cosa-1 at 41-53 AA</i>                           | This study                                            |
| sYH_0305 | <i>OLLAS::cosa-1<sup>Δ58-360</sup>/qC1 III Frameshift mutation in cosa-1, which had a stop codon at 58 site.</i> | This study                                            |
| sYH_0289 | <i>MEIS8[PIE-1P::GFP::cosa-1, UNC-119(+)] II; OLLAS::cosa-1-4A III</i>                                           | This study                                            |
| sYH_0290 | <i>MEIS8[PIE-1P::GFP::cosa-1, UNC-119(+)] II; OLLAS::cosa-1-6A III</i>                                           | This study                                            |
| sYH_0291 | <i>MEIS8[PIE-1P::GFP::cosa-1, UNC-119(+)] II; OLLAS::cosa-1<sup>Δ41-53</sup> III</i>                             | This study                                            |
| sYH_0308 | <i>MEIS8[PIE-1P::GFP::cosa-1, UNC-119(+)] II; OLLAS::cosa-1<sup>Δ58-360</sup> III</i>                            | This study                                            |
| sYH_0240 | <i>OLLAS::cosa-1 III; GFP::msh-5 IV</i>                                                                          | This study                                            |
| sYH_0297 | <i>OLLAS::cosa-1-4A/qC1 III; GFP::msh-5 IV</i>                                                                   | This study                                            |
| sYH_0298 | <i>OLLAS::cosa-1-6A/qC1 III; GFP::msh-5 IV</i>                                                                   | This study                                            |
| sYH_0329 | <i>OLLAS::cosa-1<sup>Δ58-360</sup>/qC1 III; GFP::msh-5 IV</i>                                                    | This study                                            |
| sYH_0241 | <i>OLLAS::cosa-1 III; zhp-3::GFP V</i>                                                                           | This study                                            |
| sYH_0299 | <i>OLLAS::cosa-1-4A/qC1 III; zhp-3::GFP V</i>                                                                    | This study                                            |
| sYH_0300 | <i>OLLAS-cosa-1-6A/qC1 III; zhp-3-GFP V</i>                                                                      | This study                                            |

|          |                                                                                                                            |            |
|----------|----------------------------------------------------------------------------------------------------------------------------|------------|
| sYH_0330 | <i>OLLAS::cosa-1<sup>Δ58-360</sup>/qC1 III; zhp-3::GFP V</i>                                                               | This study |
| sYH_0402 | <i>cdk-2::AID::3xFLAG I; OLLAS::cosa-1 III</i>                                                                             | This study |
| sYH_0403 | <i>cdk-2::AID::3xFLAG I; OLLAS::cosa-1-4A/qC1 III</i>                                                                      | This study |
| sYH_0404 | <i>cdk-2::AID::3xFLAG I; OLLAS::cosa-1-6A/qC1 III</i>                                                                      | This study |
| sYH_0415 | <i>cdk-2::AID::3xFLAG I; OLLAS::cosa-1<sup>Δ58-360</sup>/qC1 III</i>                                                       | This study |
| sYH_0432 | <i>cosa-1::3xHA::TurboID III</i>                                                                                           | This study |
| sYH_0433 | <i>cdk-2::AID::3xFLAG I; cosa-1::3xHA::TurboID III</i>                                                                     | This study |
| sYH_0607 | <i>cosa-1::3xHA::TurboID III; GFP::him-6 IV</i>                                                                            | This study |
| sYH_0433 | <i>cdk-2::AID::3xFLAG I; cosa-1::3xHA::TurboID III</i>                                                                     | This study |
| sYH_0389 | <i>OLLAS::cosa-1::3xFLAG III</i>                                                                                           | This study |
| sYH_0416 | <i>OLLAS::cosa-1-4A::3xFLAG/qC1 III</i>                                                                                    | This study |
| sYH_0417 | <i>OLLAS::cosa-1-6A::3xFLAG/qC1 III</i>                                                                                    | This study |
| sYH_0526 | <i>OLLAS::cosa-1-4A::3xFLAG::GFP nanobody/qC1 III</i>                                                                      | This study |
| sYH_0534 | <i>OLLAS::cosa-1-4A::3xFLAG::GFP nanobody/qC1 III ; GFP::msh-5/nt1 IV</i>                                                  | This study |
| sYH_0553 | <i>OLLAS::cosa-1-4A::3xFLAG::GFP nanobody/qC1 III ; zhp-3::GFP V</i>                                                       | This study |
| sYH_0569 | <i>OLLAS::cosa-1::3xFLAG::GFP nanobody III</i>                                                                             | This study |
| sYH_0572 | <i>OLLAS::cosa-1::3xFLAG::GFP nanobody III; zhp-3::GFP V</i>                                                               | This study |
| sYH_0573 | <i>OLLAS::cosa-1::3xFLAG::GFP nanobody III; GFP::msh-5/nt1 IV</i>                                                          | This study |
| sYH_0527 | <i>rtel-1::AID::3xHA I</i>                                                                                                 | This study |
| sYH_0532 | <i>rtel-1::AID::3xHA I; ieSi38 [sun-1p::TIR1::mRuby::sun-1 3'UTR + Cbr-unc-119(+)] IV</i>                                  | This study |
| sYH_0533 | <i>rtel-1::AID::3xHA I; OLLAS::cosa-1-4A::3xFLAG/qC1 III; ieSi38 [sun-1p::TIR1::mRuby::sun-1 3'UTR + Cbr-unc-119(+)]IV</i> | This study |
| sYH_0512 | <i>msh-5::AID::3xHA IV</i>                                                                                                 | This study |
| sYH_0525 | <i>msh-5::AID::3xHA IV; ieSi38 [sun-1p::TIR1::mRuby::sun-1 3'UTR + Cbr-unc-119(+)] IV</i>                                  | This study |
| sYH_0070 | <i>him-18(tm2181)/qC1 III; GFP::him-6 IV</i>                                                                               | This study |
| sYH_0071 | <i>Mels8[pie-1p::GFP::cosa-1, unc-119(+)] II; him-18(tm2181)/qC1 III</i>                                                   | This study |
| sYH_0072 | <i>him-18(tm2181)/qC1 III; zhp-3::GFP V</i>                                                                                | This study |
| sYH_0073 | <i>him-18(tm2181)/qC1 III; GFP::msh-5 IV</i>                                                                               | This study |
| sYH_0242 | <i>OLLAS::cosa-1 III; him-18(tm2181) III /qC1; GFP::msh-5 IV</i>                                                           | This study |
| sYH_0243 | <i>OLLAS::cosa-1 III; him-18(tm2181) III /qC1; zhp-3::GFP V</i>                                                            | This study |
| sYH_0324 | <i>OLLAS::cosa-1-4A III; him-18(tm2181) III /qC1</i>                                                                       | This study |
| sYH_0253 | <i>OLLAS::cosa-1 III; him-18(tm2181) III /qC1</i>                                                                          | This study |

|          |                                                                              |                                |
|----------|------------------------------------------------------------------------------|--------------------------------|
| sYH_0177 | <i>mus-81 (tm1937) /ht2 I; xpf-1(TG1660) II; zhp-3::GFP V</i>                | This study                     |
| sYH_0633 | <i>zhp-3::AID::3xHA I</i>                                                    | This study                     |
| sYH_0655 | <i>zhp-3::AID::3xHA I; OLLAS::cosa-1::3xFLAG III</i>                         | This study                     |
| sYH_0656 | <i>zhp-3::AID::3xHA I; OLLAS::cosa-1-4A::3xFLAG /qC1III</i>                  | This study                     |
| sYH_0657 | <i>zhp-3::AID::3xHA I; OLLAS::cosa-1-6A::3xFLAG /qC1III</i>                  | This study                     |
| sYH_0658 | <i>zhp-3::AID::3xHA I; OLLAS::cosa-1<sup>Δ58-360</sup> /qC1 III</i>          | This study                     |
| sYH_0648 | <i>3xFLAG::dsb-2 I</i>                                                       | This study                     |
| sYH_0649 | <i>3xFLAG::dsb-2 I; OLLAS::cosa-1 III</i>                                    | This study                     |
| sYH_0650 | <i>3xFLAG::dsb-2 I; OLLAS::cosa-1-4A /qC1III</i>                             | This study                     |
| sYH_0651 | <i>3xFLAG::dsb-2 I; OLLAS::cosa-1-6A /qC1III</i>                             | This study                     |
| sYH_0652 | <i>3xFLAG::dsb-2 I; OLLAS::cosa-1<sup>Δ58-360</sup> /qC1III</i>              | This study                     |
| sYH_0678 | <i>msh-5-T1009A::AID::3xHA IV</i>                                            | This study                     |
| sYH_0679 | <i>OLLAS::cosa-1::3xFLAG III; msh-5-T1009A::AID::3xHA IV</i>                 | This study                     |
| sYH_0680 | <i>OLLAS::cosa-1-4A::3xFLAG/qC1 III; msh-5-T1009A::AID::3xHA IV</i>          | This study                     |
| sYH_0681 | <i>OLLAS::cosa-1::3xFLAG III; GFP::him-6 IV; msh-5::AID::3xHA IV</i>         | This study                     |
| sYH_0682 | <i>OLLAS::cosa-1-4A::3xFLAG/qC1 III; GFP::him-6 IV; msh-5::AID::3xHA IV</i>  | This study                     |
| sYH_0100 | <i>mIs12 (CB5584)</i>                                                        | Caenorhabditis Genetics Center |
| sYH_0124 | Hawaii (CB4856)                                                              | Caenorhabditis Genetics Center |
| sYH_0701 | <i>zhp-3::GFP V (Hawaii)</i>                                                 | This study                     |
| sYH_0702 | <i>OLLAS::cosa-1-4A::3xFLAG::GFP nanobody/qC1III (Hawaii)</i>                | This study                     |
| sYH_0703 | <i>OLLAS::cosa-1-4A::3xFLAG::GFP nanobody/ qC1III; zhp-3::GFP V (Hawaii)</i> | This study                     |
| sYH_0524 | <i>OLLAS::cosa-1::3xFLAG III; msh-5::AID::3xHA IV</i>                        | This study                     |
| sYH_0666 | <i>OLLAS::cosa-1-4A::3xFLAG/qC1III; msh-5::AID::3xHA IV</i>                  | This study                     |
| sYH_0667 | <i>OLLAS::cosa-1-6A::3xFLAG/qC1III; msh-5::AID::3xHA IV</i>                  | This study                     |
| sYH_0668 | <i>OLLAS::cosa-1<sup>Δ58-360</sup>/qC1III; msh-5::AID::3xHA IV</i>           | This study                     |
